# Supplementary material for: Mass Spectrometry-based Proteomic and Immunoproteomic Analyses of the Candida albicans Hyphal Secretome Reveal Diagnostic Biomarker Candidates for Invasive Candidiasis
Source: Preprints.org preprint supplement (doi:10.20944/preprints202105.0752.v1), 2021-05-31
Supplement: Supplementary file 1 [file supplementary]

Archive with 7 entries (7 files):
- Figures S1-S4.pdf
- Table S1.xlsx
- Table S2.xlsx
- Table S3.xlsx
- Table S4.xlsx
- Table S5.xlsx
- Table S6.xlsx
