# Supplementary material for: Mass Spectrometry-based Proteomic and Immunoproteomic Analyses of the Candida albicans Hyphal Secretome Reveal Diagnostic Biomarker Candidates for Invasive Candidiasis
Source: Preprints.org preprint supplement (doi:10.20944/preprints202105.0752.v1), 2021-05-31
Supplement: Supplementary file 1 [file supplementary › Table S1.xlsx]

## Sheet: Supplementary Table 1
Table S1. Baseline characteristics of the patients included in this study.
Patient group1	Age (yr)	Sex	Hospital ward	C. albicans
				isolation site
ncIC	44	female	anaesthesiology	swab intraperitoneal
ncIC	76	male	anaesthesiology	swab abdominal zone
ncIC	41	male	anaesthesiology	blood culture
ncIC	68	female	general surgery	pleura
ncIC	61	male	general surgery	swab thorax
ncIC	29	male	general surgery	blood culture
ncIC	19	female	neurology	abdomen
ncIC	63	male	neurology	blood culture
ncIC	87	female	oral and maxillofacial surgery	tissue peritoneum
ncIC	74	female	oral and maxillofacial surgery	blood culture
ncIC	80	female	thoracic and cardiovascular surgery	blood culture
ncIC	72	male	thoracic and cardiovascular surgery	swab pleura
cIC	73	female	anaesthesiology	venous catheter
cIC	57	male	anaesthesiology	central venous catheter
cIC	42	male	anaesthesiology	central venous catheter
cIC	33	male	anaesthesiology	central venous catheter
cIC	71	male	general surgery	venous catheter
cIC	27	male	general surgery	urine catheter
cIC	76	female	neurology	venous catheter
cIC	46	female	neurology	central venous catheter
cIC	82	male	neurology	catheter
cIC	70	male	neurology	venous catheter
cIC	70	male	neurology	venous catheter tip
non-IC	78	male	anaesthesiology	-
non-IC	54	female	neurology	-
non-IC	42	female	neurology	-
non-IC	67	male	neurology	-
non-IC	29	male	neurology	-
non-IC	58	female	trauma surgery	-
non-IC	46	female	trauma surgery	-
non-IC	43	female	trauma surgery	-
non-IC	69	male	trauma surgery	-
non-IC	33	male	trauma surgery	-
non-IC	21	male	trauma surgery	-
