# Supplementary material for: Mass Spectrometry-based Proteomic and Immunoproteomic Analyses of the Candida albicans Hyphal Secretome Reveal Diagnostic Biomarker Candidates for Invasive Candidiasis
Source: Preprints.org preprint supplement (doi:10.20944/preprints202105.0752.v1), 2021-05-31
Supplement: Supplementary file 1 [file supplementary › Table S2.xlsx]

## Sheet: Supplementary Table 2
Table S2. C. albicans hyphal secreted proteins identified after cell growth in salt medium+GlcNac and Lee medium.
Salt medium+GlcNac	Lee medium, pH 6.7
2.0% of proteins with signal peptide	23.4% of proteins with signal peptide
Acb1, Aco1, Ade12, Adh1, Ahp1, Ald5, Anb1, Ape2, Aro3, Aro4, Asn1, Asr2, Asr3, Atp2, Bat22, Cat1, Cdc19, Cef3, Cip1, Cmd1, Cof1, Csh1, Cyc1, Cyp1, Dak2, Eft2, Egd1, Egd2, Eno1, Erg10, Fba1, Fum12, Gcv3, Gdh3, Glk1, Glr1, Glx3, Gnd1, Gpm1, Grp2, Hem13, His1, Hom2, Hpt1, Hsp60, Hsp70, Hxk2, Idp1, Ilv5, Imh3, Ipp1, Kar2, Krs1, Mdg1, Mdh1-1, Met6, Nhp6a, Orf19.2244, Orf19.3475, Orf19.4216, Orf19.4609…	Aat1, Acb1, Ado1,Als3, Ams1, Ape2, Arg1, Asc1, Bgl2, Bmh1, Cat1, Cdc19, Cip1, Cit1, Cof1, Coi1, Crd2, Crh11, Csa2, Csh1, Cyc1, Cyp1, Cyp5, Dag7, Ece1, Ecm33, Eno1, Erg20, Fba1, Fum11, Gcv3, Gcy1, Glr1, Glx3, Gnd1, Gpm1, Gre3, Grp2, Hbr2, Hex1, Hom2, Hpt1, Hsp70, Hxk2, Hyr1, Idi1, Ino1, Ipp1, Kar2, Lpd1, Mal2, Mbf1, Mcr1, Met6, Mmd1, Mp65, Ntf2, Orf19.1239, Orf19.1738.1, Orf19.1862, Orf19.2269, Or…
Proteins in bold presented signal peptide both in SignalP 4.1 and in Candida Genome Database (CGD).
