# Supplementary material for: Mass Spectrometry-based Proteomic and Immunoproteomic Analyses of the Candida albicans Hyphal Secretome Reveal Diagnostic Biomarker Candidates for Invasive Candidiasis
Source: Preprints.org preprint supplement (doi:10.20944/preprints202105.0752.v1), 2021-05-31
Supplement: Supplementary file 1 [file supplementary › Table S3.xlsx]

## Sheet: Supplementary Table 3
Table S3. C. albicans hyphal secreted proteins identified with at least 2 peptides and present in both independent batches (S1 and S2).
Systematic Name	Standard Name	Assembly 19/21 Identifier	NSAF (average)	Signal peptide	Ranking
C1_08500C_A	ENO1	orf19.395	0.078628		1
C6_00750C_A	PGK1	orf19.3651	0.0446149		2
C6_03030W_A	SAP5	orf19.5585	0.0353573	P	3
C7_02380C_A	CYP1	orf19.6472	0.0342924		4
C4_01750C_A	FBA1	orf19.4618	0.0306967		5
C2_10030C_A	MP65	orf19.1779	0.0261549	P	6
C1_13860C_A	GND1	orf19.5024	0.0221281		7
C3_07440W_A	TPI1	orf19.6745	0.0192475		8
C3_06870W_A	TDH3	orf19.6814	0.0186265		9
C3_06180C_A	TSA1	orf19.7417	0.0185675		10
C4_03470C_A	ECE1	orf19.3374	0.0159125		11
C4_06980W_A	PRA1	orf19.3111	0.0140749	P	12
CR_03720W_A	TAL1	orf19.4371	0.0139998		13
C2_05460W_A	CDC19	orf19.3575	0.013035		14
CR_10350C_A	TRX1	orf19.7611	0.0128605		15
C1_07900W_A	COI1	orf19.5063	0.0127902	P	16
C1_08030W_A	PFY1	orf19.5076	0.0119246		17
C3_06360C_A	CYP5	orf19.7421	0.0116822	P	18
CR_06340C_A	PGI1	orf19.3888	0.0111172		19
C1_03220C_A	BMH1	orf19.3014	0.011011		20
C2_03270W_A	GPM1	orf19.903	0.0106977		21
CR_01620C_A	MET6	orf19.2551	0.0103739		22
CR_04510W_A	HXK2	orf19.542	0.0103147		23
C5_02890W_A	YNK1	orf19.4311	0.0102881		24
C7_00110W_A	SOD3	orf19.7111.1	0.00956023		25
C5_00370W_A	COF1	orf19.953.1	0.00941274		26
C1_01350C_A	TIF	orf19.3324	0.00927117		27
C4_07180W_A	UBI3	orf19.3087	0.00924842		28
C4_06570C_A	PDC11	orf19.2877	0.00900886		29
C5_04270C_A	SAH1	orf19.3911	0.00894206		30
C5_02860C_A	GRP2	orf19.4309	0.00878791		31
C6_02240C_A	RPL10A	orf19.3465	0.00870275		32
C1_02480W_A	PMM1	orf19.2937	0.00807454		33
C2_08810C_A	IPP1	orf19.3590	0.00758475		34
C1_04300C_A	SSA2	orf19.1065	0.00751047		35
C1_02590C_A	SNZ1	orf19.2947	0.00748349		36
C7_02570C_A	RBP1	orf19.6452	0.00742642		37
C1_13480W_A	HSP70	orf19.4980	0.0073411		38
C2_10110W_A	CYC1	orf19.1770	0.00714974		39
C7_00750W_A	ACB1	orf19.7043.1	0.00675294		40
C1_03510C_A	orf19.3053	orf19.3053	0.00656808		41
C4_02410C_A	AHP1	orf19.2762	0.00652919		42
C3_05000W_A	RDI1	orf19.5968	0.00649438		43
CR_10100C_A	INO1	orf19.7585	0.0061791		44
C1_13940W_A	SIM1	orf19.5032	0.00610786	P	45
C1_02990C_A	XOG1	orf19.2990	0.00558465	P	46
C7_01250W_A	ASC1	orf19.6906	0.00555054		47
C1_03190C_A	ECM33	orf19.3010.1	0.00530089	P	48
C2_03100W_A	EFT2	orf19.5788	0.00529646		49
C3_05130C_A	THI4	orf19.5986	0.005229		50
C6_00100C_A	HET1	orf19.6327	0.00490269		51
CR_06700C_A	SOL3	orf19.704	0.00478792		52
C1_06900C_A	MMD1	orf19.6220.3	0.0047389		53
C1_10100C_A	NTF2	orf19.4879.2	0.00453145		54
C4_02250C_A	BGL2	orf19.4565	0.00452231	P	55
CR_09240C_A	orf19.7322	orf19.7322	0.00433028		56
C2_04580W_A	ERG20	orf19.4491	0.00416055		57
CR_03500W_A	CIT1	orf19.4393	0.0040836		58
CR_00620C_A	ARG1	orf19.7469	0.00408158		59
CR_03090C_A	MLC1	orf19.2416.1	0.00392502		60
CR_08340W_A	CYS3	orf19.6402	0.00391918		61
C1_13050W_A	RPL14	orf19.4931.1	0.00387484		62
C3_04140C_A	EGD2	orf19.5858	0.0038565		63
C6_00850W_A	orf19.86	orf19.86	0.00380557		64
C2_04310W_A	ERG10	orf19.1591	0.00379379		65
CR_00860C_A	TMA19	orf19.3268	0.00378089		66
C6_01070C_A	CIP1	orf19.113	0.00352812		67
C4_00200C_A	MET15	orf19.5645	0.00344335		68
C6_01610W_A	ANB1	orf19.3426	0.00340738		69
C6_02330W_A	orf19.3475	orf19.3475	0.00328299		70
C1_00070W_A	MVD	orf19.6105	0.00321018		71
C5_01230C_A	orf19.1946	orf19.1946	0.00320475		72
C1_11450C_A	SAM2	orf19.657	0.00317661		73
CR_08460W_A	TPM2	orf19.6414.3	0.00312987		74
C7_02030W_A	HSP90	orf19.6515	0.00310596		75
C1_01060W_A	MBF1	orf19.3294	0.00309197		76
C1_14440C_A	GDI1	orf19.7261	0.00309194		77
CR_10110W_A	CHT3	orf19.7586	0.00307298	P	78
C1_08060W_A	orf19.5078	orf19.5078	0.00295585		79
CR_06150C_A	ADE13	orf19.3870	0.00283429		80
C1_13260W_A	orf19.4952.1	orf19.4952.1	0.00280248	P	81
C1_00490C_A	TTR1	orf19.6059	0.00275625		82
C3_06920W_A	orf19.6809	orf19.6809	0.00269312		83
C1_07410C_A	SKP1	orf19.4427	0.00267788		84
C1_11650W_A	EGD1	orf19.1154	0.00267765		85
C2_01440C_A	orf19.1448.1	orf19.1448.1	0.00256828		86
C2_02370C_A	HOM2	orf19.1559	0.00254153		87
C4_01900C_A	MDH1-1	orf19.4602	0.00251374		88
C3_04950W_A	ARF2	orf19.5964	0.00246989		89
C4_06030W_A	CMD1	orf19.4413	0.00236115		90
C1_06370C_A	PBR1	orf19.6274	0.00233471	P	91
C5_05320C_A	HIS1	orf19.4026	0.00232475		92
C1_02860C_A	YKT6	orf19.2974	0.00232082		93
C6_03500C_A	SAP4	orf19.5716	0.00228348	P	94
C6_03960W_A	orf19.5773	orf19.5773	0.00220526		95
C1_11700C_A	MRF1	orf19.1149	0.0021672		96
C2_05700W_A	OSM1	orf19.6882	0.00216378		97
C5_04090C_A	SUI1	orf19.1280	0.00213114		98
C1_13760W_A	AGM1	orf19.5013	0.00208346		99
C5_05390C_A	PGA4	orf19.4035	0.00205497	P	100
C2_07630C_A	orf19.1862	orf19.1862	0.00203768		101
CR_07620W_A	AAT21	orf19.6287	0.00203364		102
CR_07400C_A	LPD1	orf19.6127	0.00199295		103
CR_02130W_A	ECM4	orf19.2613	0.00194325		104
CR_08210C_A	ACO1	orf19.6385	0.00194174		105
CR_09290W_A	THI13	orf19.7324	0.00193212		106
C3_05200W_A	RPS19A	orf19.5996.1	0.00187992		107
C5_04470C_A	orf19.3932	orf19.3932	0.00182884		108
C2_08800C_A	APE3	orf19.3591	0.00179516	P	109
CR_05390W_A	PST3	orf19.5285	0.00177609		110
C3_05590C_A	BAT22	orf19.6994	0.00168237		111
C3_07340W_A	GCY1	orf19.6757	0.00159595		112
CR_10490W_A	EIF4E	orf19.7626	0.00156584		113
C7_03570W_A	ARG4	orf19.6689	0.00153686		114
C2_06310C_A	GSP1	orf19.5493	0.00149577		115
CR_04530W_A	FUM11	orf19.543	0.00148		116
C1_01520C_A	SOD2	orf19.3340	0.00145548		117
CR_08150W_A	RPS20	orf19.6375	0.0014336		118
C2_00340C_A	ARO8	orf19.2098	0.00141816		119
C2_02030W_A	ARO3	orf19.1517	0.0014148		120
C3_01730C_A	UTR2	orf19.1671	0.00140143		121
C5_00930C_A	TFS1	orf19.1974	0.00139527		122
C2_05550W_A	orf19.6867	orf19.6867	0.00138343		123
CR_00510C_A	ADE1	orf19.7484	0.00137629		124
C6_04280W_A	orf19.1085	orf19.1085	0.00134173		125
C3_07150C_A	RPS12	orf19.6785	0.00132824		126
C1_14120C_A	RBE1	orf19.7218	0.00132695	P	127
C1_01300W_A	orf19.3319	orf19.3319	0.00131741		128
C4_01770W_A	POL30	orf19.4616	0.00131495		129
C6_03230W_A	ARG3	orf19.5610	0.00129052		130
C5_02710W_A	TRR1	orf19.4290	0.00128803		131
CR_10840C_A	XYL2	orf19.7676	0.00124993		132
C2_03090C_A	ADE8	orf19.5789	0.00122074		133
CR_04650W_A	orf19.1738.1	orf19.1738.1	0.00121324		134
C2_10860C_A	orf19.5369	orf19.5369	0.00120919		135
C1_03110W_A	RPL6	orf19.3003.1	0.00119725		136
C1_00710C_A	TUB2	orf19.6034	0.00119144		137
CR_09120C_A	TUB1	orf19.7308	0.0011821		138
C3_02110W_A	RPL12	orf19.1635	0.00115804		139
C5_04300C_A	orf19.3915	orf19.3915	0.00115687		140
CR_08090W_A	SSB1	orf19.6367	0.00114137		141
CR_10670W_A	CPR6	orf19.7654	0.00111253		142
C3_01420C_A	orf19.1709	orf19.1709	0.00110532		143
CR_04090C_A	ADE17	orf19.492	0.00110529		144
C2_09060C_A	ASN1	orf19.198	0.00109554		145
C1_00400W_A	SVF1	orf19.6068	0.00108898		146
C1_06100C_A	MSI3	orf19.2435	0.00108229		147
CR_10020C_A	orf19.7578	orf19.7578	0.00106217	P	148
C4_06620C_A	orf19.2870	orf19.2870	0.00105546	P	149
C4_04050C_A	RHD3	orf19.5305	0.00105302	P	150
CR_00090C_A	orf19.7531	orf19.7531	0.00104973		151
CR_09100C_A	orf19.7306	orf19.7306	0.00103592		152
CR_02860W_A	RHO1	orf19.2843	0.00102909		153
C3_01810C_A	MNT1	orf19.1665	0.0010224		154
C1_01330C_A	DUT1	orf19.3322	0.00100828		155
C2_09970C_A	orf19.1355	orf19.1355	0.000994144		156
C4_06120W_A	GDH3	orf19.4716	0.000991781		157
C5_00480C_A	SEC14	orf19.941	0.000968283		158
C2_06960W_A	SPE3	orf19.2250	0.000966786		159
C5_03610W_A	HEX1	orf19.6673	0.000934185	P	160
CR_10270C_A	AHA1	orf19.7602	0.000926784		161
C4_01510W_A	orf19.4633	orf19.4633	0.000900789		162
C3_07410C_A	KRS1	orf19.6749	0.000897689		163
C1_11330C_A	SMT3	orf19.670	0.00086969		164
C3_06590W_A	LYS9	orf19.7448	0.00086235		165
C6_02040W_A	MCR1	orf19.3507	0.000859892		166
C3_06010W_A	CAM1	orf19.7382	0.000849366		167
CR_10790W_A	MAL2	orf19.7668	0.000844329		168
C1_03680W_A	ENG1	orf19.3066	0.000832268	P	169
C5_00590W_A	PET9	orf19.930	0.000831014		170
C2_00960C_A	MXR1	orf19.2028	0.000818971		171
C1_10450W_A	GLY1	orf19.986	0.000815311		172
CR_03520C_A	orf19.4395	orf19.4395	0.000806733		173
C1_00220W_A	PHR2	orf19.6081	0.000801812	P	174
C3_07830W_A	FBP1	orf19.6178	0.000800011		175
C1_01370C_A	RPS21B	orf19.3325.3	0.000794451		176
C1_00060W_A	TUP1	orf19.6109	0.000794451		177
C2_06890C_A	orf19.2244	orf19.2244	0.000777956		178
C1_13680C_A	GCV3	orf19.5006	0.000762673		179
C3_07330W_A	orf19.6758	orf19.6758	0.000756648		180
C1_07840W_A	orf19.5054	orf19.5054	0.000753902		181
C1_12360C_A	RIB3	orf19.5228	0.000751317		182
C7_00990W_A	RPP0	orf19.7015	0.000740743		183
C4_02320C_A	SOD1	orf19.2770.1	0.000740416		184
C3_04090W_A	SBP1	orf19.5854	0.000717248		185
C5_01560C_A	orf19.4150	orf19.4150	0.000687082	P	186
C1_09490C_A	GUA1	orf19.4813	0.000674828		187
C4_04900W_A	RPL30	orf19.3788.1	0.000663194		188
CR_05800C_A	orf19.6630	orf19.6630	0.000655223	P	189
C3_07220C_A	PRO2	orf19.6779	0.00064792		190
C1_04610W_A	ATP1	orf19.6854	0.000647431		191
C5_03860W_A	HAM1	orf19.1108	0.000623056		192
CR_09010C_A	orf19.7297	orf19.7297	0.00061823		193
C4_02070W_A	PHO114	orf19.4584	0.000615224		194
CR_04660C_A	UGP1	orf19.1738	0.000614054		195
C1_10700C_A	NIT3	orf19.2351	0.000579539		196
C1_03500W_A	YPT1	orf19.3052	0.000575071		197
C1_04100C_A	POR1	orf19.1042	0.000573737		198
C1_14060W_A	orf19.7214	orf19.7214	0.000571771		199
C3_05710W_A	RCT1	orf19.7350	0.000569775		200
C5_04360C_A	orf19.3922	orf19.3922	0.000567064		201
C2_10630W_A	orf19.5342	orf19.5342	0.000566369	P	202
C3_04920C_A	orf19.5961	orf19.5961	0.000558735		203
C1_02240W_A	orf19.3681	orf19.3681	0.000555725		204
C5_02080C_A	HSP12	orf19.3160	0.000555371		205
C6_01860C_A	HCH1	orf19.3396	0.000545399		206
C1_02600W_A	SNO1	orf19.2948	0.000528633		207
CR_09270C_A	CBP1	orf19.7323	0.000528026		208
C1_04730C_A	LYS21	orf19.772	0.000514241		209
C2_00880W_A	orf19.2036	orf19.2036	0.000512368		210
C2_02690W_A	SER2	orf19.5838	0.000511712		211
C1_01690C_A	LSC1	orf19.3358	0.000505638		212
CR_07590W_A	EMP24	orf19.6293	0.000491219	P	213
C1_09630W_A	IDH1	orf19.4826	0.000486399		214
C1_13160W_A	PSA2	orf19.4943	0.000480835		215
CR_00130C_A	orf19.7522	orf19.7522	0.000480493		216
C4_02710C_A	GRX3	orf19.2727	0.000465727		217
C4_00270W_A	ATP2	orf19.5653	0.000457639		218
C1_10280C_A	orf19.4898	orf19.4898	0.000451008		219
C1_10780C_A	HNT1	orf19.2341	0.000448631		220
C1_10720C_A	MNN2	orf19.2347	0.000426068		221
C4_05390W_A	orf19.1796	orf19.1796	0.000424577		222
C3_04880W_A	PIN3	orf19.5956	0.000418914		223
C7_02810W_A	PRX1	orf19.5180	0.000408752		224
CR_09350C_A	orf19.7330	orf19.7330	0.000408575		225
C1_07230W_A	PHO15	orf19.4444	0.00039377		226
C3_04650W_A	orf19.5925	orf19.5925	0.0003862		227
C3_00200C_A	ETR1	orf19.5450	0.00037627		228
C7_00400W_A	LEU2	orf19.7080	0.000374393		229
C3_01480C_A	RKI1	orf19.1701	0.000362049		230
C7_04040C_A	NPT1	orf19.7176	0.00035777		231
CR_07080W_A	orf19.1815	orf19.1815	0.000356563		232
C1_06810W_A	CAT1	orf19.6229	0.00034355		233
C4_00220C_A	SUB2	orf19.5647	0.000342153		234
CR_03600C_A	orf19.4382	orf19.4382	0.000337466		235
C2_05590C_A	orf19.6872	orf19.6872	0.00032748		236
C6_03700W_A	ALS1	orf19.5741	0.000324914	P	237
CR_09670C_A	orf19.6596	orf19.6596	0.000320453		238
CR_00180C_A	CHT1	orf19.7517	0.000316846	P	239
C4_04470W_A	SAP10	orf19.3839	0.000314275	P	240
C3_03010C_A	DTD2	orf19.297	0.000312844		241
C1_12140W_A	orf19.5250	orf19.5250	0.000312844		242
C7_00930W_A	GPH1	orf19.7021	0.000311801		243
C3_00640W_A	orf19.5393	orf19.5393	0.000306475		244
C1_08260C_A	LTP1	orf19.5104	0.000304177		245
C2_09600C_A	orf19.1394	orf19.1394	0.00029946		246
C7_03660C_A	orf19.6701	orf19.6701	0.000295992		247
C7_00140C_A	orf19.7109	orf19.7109	0.000282823		248
C6_02010C_A	GPD2	orf19.691	0.000274505		249
C2_10470C_A	orf19.5322	orf19.5322	0.000269496	P	250
C3_03280C_A	HTA3	orf19.327	0.000264817		251
C2_06730W_A	LSP1	orf19.3149	0.000264418		252
C3_04180W_A	KRE9	orf19.5861	0.000262087	P	253
C2_08640C_A	PST2	orf19.3612	0.00025806		254
C1_06460C_A	RPS22A	orf19.6265	0.00025766		255
C3_04060C_A	HEM13	orf19.2803	0.000255102		256
C1_00500C_A	GLO1	orf19.6058	0.000250477		257
CR_07710W_A	ARO2	orf19.1986	0.000249996		258
C1_14290C_A	MDG1	orf19.7239	0.000241702		259
CR_08060C_A	VPS21	orf19.589	0.000239312		260
C3_06860C_A	orf19.6816	orf19.6816	0.000238335		261
C3_05190C_A	MCA1	orf19.5995	0.000237406		262
C2_00770W_A	orf19.2047	orf19.2047	0.000233329		263
C1_14450C_A	orf19.7263	orf19.7263	0.000223004		264
C4_02940W_A	ABP1	orf19.2699	0.000222862		265
C3_07490W_A	orf19.6739	orf19.6739	0.00021664		266
CR_00540C_A	MDH1	orf19.7481	0.000211854		267
C1_02430C_A	orf19.2930	orf19.2930	0.000206614		268
CR_10210W_A	PGA12	orf19.7597	0.000206325	P	269
C2_03010C_A	RNR21	orf19.5801	0.000203662		270
C3_04810C_A	orf19.5943.1	orf19.5943.1	0.000200694		271
C1_04220C_A	orf19.1057	orf19.1057	0.00018693		272
C3_02510C_A	SAP8	orf19.242	0.000182954	P	273
C4_01950W_A	orf19.4597	orf19.4597	0.00017021		274
C3_06490W_A	orf19.7437	orf19.7437	0.000168792		275
C3_05880C_A	orf19.7368	orf19.7368	0.000166312		276
CR_01750C_A	SEC4	orf19.2571	0.000165081		277
C3_07310C_A	SLK19	orf19.6763	0.000155738		278
C2_03260W_A	orf19.904	orf19.904	0.000144995		279
C4_02270C_A	BFR1	orf19.4560	0.000142556		280
C2_07070W_A	orf19.2262	orf19.2262	0.000136135		281
CR_05170C_A	FDH1	orf19.638	0.000133969		282
CR_07790C_A	YHB1	orf19.3707	0.000127515		283
C4_05140C_A	GDB1	orf19.744	0.000125515		284
C3_03410C_A	orf19.338	orf19.338	0.000123871		285
C7_00940W_A	orf19.7020	orf19.7020	0.000122663	P	286
C1_10160W_A	MIR1	orf19.4885	0.000117334		287
C3_06500W_A	UBA1	orf19.7438	0.00011582		288
C1_04210C_A	CDC3	orf19.1055	0.000114284		289
C7_01650W_A	orf19.6559	orf19.6559	0.000107554		290
C3_06280W_A	orf19.7404	orf19.7404	0.000105633		291
C7_04210C_A	orf19.7152	orf19.7152	9.70322e-05		292
CR_09330C_A	orf19.7328	orf19.7328	9.41327e-05		293
C5_03820C_A	BUD7	orf19.1112	8.84772e-05		294
C7_01640W_A	LAT1	orf19.6561	7.62673e-05		295
C1_05290W_A	GRS1	orf19.437	7.59824e-05		296
CR_00520C_A	CRM1	orf19.7483	7.39756e-05		297
C7_03860W_A	orf19.7196	orf19.7196	7.31932e-05	P	298
CR_04300W_A	orf19.518	orf19.518	4.69626e-05		299
C4_02360W_A	orf19.2768	orf19.2768	4.25848e-05		300
C1_00140W_A	orf19.6092	orf19.6092	3.348e-05		301
