# Supplementary material for: Mass Spectrometry-based Proteomic and Immunoproteomic Analyses of the Candida albicans Hyphal Secretome Reveal Diagnostic Biomarker Candidates for Invasive Candidiasis
Source: Preprints.org preprint supplement (doi:10.20944/preprints202105.0752.v1), 2021-05-31
Supplement: Supplementary file 1 [file supplementary › Table S4.xlsx]

## Sheet: Supplementary Table 4
Table S4. C. albicans hyphal secreted proteins identified with at least 2 peptides in the left upper corner of the preparative 2-DE gel.
Accession	Description	MW [kDa]	# AAs	calc. pI	Modifications	# Protein Unique Peptides	# Unique Peptides	Score Mascot	Coverage [%]	# Peptides	# PSMs	Exp. q-value	PSM/MW	NSAF
Q5AB48	Secreted protein RBT4 OS=Candida albicans (strain SC5314 / ATCC MYA-2876) OX=237561 GN=RBT4 PE=1 SV=3	37.4	358	4.55		11	11	6669	47	11	489	0	13.0749	0.186756
orf19.1779	MP65 CGDID:CAL0000936 COORDS:Ca21chr2_C_albicans_SC5314:2054703-2053567C, translated using codon table 12 (378 amino acids) Verified ORF; Cell surface mannoprotein; cell-wall glucan metabolism, adhesion; adhesin motif; O-glycosylation; induced by heat, germ tube formation, wall regeneration; mycelial antigen; diagnostic marker; fluconazole-repressed; Spider biofilm induced	39.2	378	5.22		7	7	12048	31	13	410	0	10.4592	0.149395
orf19.3642	SUN41 CGDID:CAL0000399 COORDS:Ca21chr6_C_albicans_SC5314:158331-159587W, translated using codon table 12 (418 amino acids) Verified ORF; Cell wall glycosidase; role in biofilm formation and cell separation; possibly secreted; hypoxia, hyphal induced; caspofungin repressed; Efg1, Cph1 regulated; O-glycosylated, possible Kex2 substrate; 5'-UTR intron; Spider biofilm induced	43.7	418	4.88		0	11	4418	35	11	354	0	8.10069	0.115707
orf19.1690	TOS1 CGDID:CAL0000187 COORDS:Ca21chr3_C_albicans_SC5314:338324-336918C, translated using codon table 12 (468 amino acids) Verified ORF; Protein similar to alpha agglutinin anchor subunit; secreted; exogenously expressed protein is a substrate for Kex2 processing in vitro; fluconazole-induced; induced by alpha pheromone in SpiderM medium; Hap43-induced	49.4	468	4.98		15	15	7546	52	15	345	0	6.98381	0.0997539
orf19.3010.1	ECM33 CGDID:CAL0006505 COORDS:Ca21chr1_C_albicans_SC5314:664402-662242C, translated using codon table 12 (423 amino acids) Verified ORF; GPI-anchored cell wall protein; mutants show cell-wall defects and reduced adhesion, host cell damage, and endocytosis; mutant infection is immunoprotective in murine model; fluconazole-induced; caspofungin repressed	43.5	423	5.05		6	6	2242	27	6	84	0	1.93103	0.0275821
orf19.7586	CHT3 CGDID:CAL0000219 COORDS:Ca21chrR_C_albicans_SC5314:2161835-2163538W, translated using codon table 12 (567 amino acids) Verified ORF; Major chitinase; secreted; functional homolog of S. cerevisiae Cts1p; 4 N-glycosylation motifs; possible O-mannosylation; putative signal peptide; hyphal-repressed; farnesol upregulated in biofilm; regulated by Efg1p, Cyr1p, Ras1p	60	567	4.91		7	7	2562	26	7	115	0	1.91667	0.0273769
orf19.3111	PRA1 CGDID:CAL0002231 COORDS:Ca21chr4_C_albicans_SC5314:1547311-1548210W, translated using codon table 12 (299 amino acids) Verified ORF; Cell surface protein that sequesters zinc from host tissue; enriched at hyphal tips; released extracellularly; binds to host complement regulators; mediates leukocyte adhesion and migration; immunogenic in mouse; produced at ambient pH	33.1	299	5.25		2	2	1153	27	7	49	0	1.48036	0.0211449
P87020	pH-regulated antigen PRA1 OS=Candida albicans (strain SC5314 / ATCC MYA-2876) OX=237561 GN=PRA1 PE=1 SV=3	33.1	299	5.25		2	2	1022	27	7	45	0	1.35952	0.0194188
orf19.251	GLX3 CGDID:CAL0004002 COORDS:Ca21chr3_C_albicans_SC5314:565948-565238C, translated using codon table 12 (236 amino acids) Verified ORF; Glutathione-independent glyoxalase; binds human immunoglobulin E; alkaline, fluconazole, Hog1 repressed; hypoxia, oxidative stress via Cap1, Hap43 induced; stationary-phase enriched; rat catheter, Spider biofilm induced	25.8	236	4.83		0	12	669	64	12	33	0	1.27907	0.0182697
orf19.5032	SIM1 CGDID:CAL0001642 COORDS:Ca21chr1_C_albicans_SC5314:3074225-3075343W, translated using codon table 12 (372 amino acids) Verified ORF; Adhesin-like protein; involved in cell wall maintenance, redundant with Sun41; possibly secreted; macrophage-repressed; repressed by Rim101, Cyr1, Ras1; Spider biofilm induced	39.4	372	4.87		9	9	1165	44	9	40	0	1.01523	0.0145011
orf19.3893	SCW11 CGDID:CAL0002202 COORDS:Ca21chr5_C_albicans_SC5314:916885-918405W, translated using codon table 12 (506 amino acids) Verified ORF; Cell wall protein; repressed in ace2 mutant; repressed in core caspofungin response; induced in high iron; possibly an essential gene, disruptants not obtained by UAU1 method; rat catheter and Spider biofilm repressed	54.3	506	4.61		10	10	673	33	10	43	0	0.791897	0.0113111
orf19.3374	ECE1 CGDID:CAL0004191 COORDS:Ca21chr4_C_albicans_SC5314:727428-726613C, translated using codon table 12 (271 amino acids) Verified ORF; Hypha-specific protein; regulated by Rfg1, Nrg1, Tup1, Cph1, Efg1, Hog1, farnesol, phagocytosis; fluconazole-induced; rat catheter and Spider biofilm induced; flow model biofilm repressed; Bcr1-repressed in RPMI a/a biofilms	28.9	271	5.77		10	11	548	63	11	18	0	0.622837	0.00889636
orf19.4371	TAL1 CGDID:CAL0001103 COORDS:Ca21chrR_C_albicans_SC5314:831860-832831W, translated using codon table 12 (323 amino acids) Verified ORF; Transaldolase; protein present in exponential and stationary growth phase yeast cultures; oxidative stress-induced via Cap1; induced by nitric oxide independent of Yhb1p; sumoylation target; rat catheter biofilm repressed	35.7	323	5		14	14	464	47	14	22	0	0.616246	0.00880222
orf19.4035	PGA4 CGDID:CAL0004772 COORDS:Ca21chr5_C_albicans_SC5314:1167315-1165960C, translated using codon table 12 (451 amino acids) Verified ORF; GPI-anchored cell surface protein; beta-1,3-glucanosyltransferase with similarity to the A. fumigatus GEL family; transcript induced in RHE model of oral candidiasis; fluconazol-induced	49	451	4.74		9	9	464	27	9	26	0	0.530612	0.00757905
orf19.6472	CYP1 CGDID:CAL0002277 COORDS:Ca21chr7_C_albicans_SC5314:519625-519137C, translated using codon table 12 (162 amino acids) Verified ORF; Peptidyl-prolyl cis-trans isomerase; cyclosporin A sensitive activity; soluble in hyphae; biofilm induced, macrophage-induced protein; downregulated upon treatment of biofilm with farnesol; present in exponential and stationary phase cells	17.6	162	7.97		6	6	211	34	6	9	0	0.511364	0.00730411
orf19.7578	orf19.7578 CGDID:CAL0000182 COORDS:Ca21chrR_C_albicans_SC5314:2147575-2146799C, translated using codon table 12 (258 amino acids) Uncharacterized ORF; Protein of unknown function	29.4	258	5.87		6	6	299	28	6	15	0	0.510204	0.00728755
orf19.3651	PGK1 CGDID:CAL0000415 COORDS:Ca21chr6_C_albicans_SC5314:133290-132037C, translated using codon table 12 (417 amino acids) Verified ORF; Phosphoglycerate kinase; localizes to cell wall and cytoplasm; antigenic in murine/human infection; flow model biofilm, Hog1-, Hap43-, GCN-induced; repressed upon phagocytosis; repressed in Spider biofilms by Bcr1, Ndt80, Rob1, Brg1	45.2	417	6.48		12	16	418	49	16	23	0	0.50885	0.0072682
orf19.395	ENO1 CGDID:CAL0004953 COORDS:Ca21chr1_C_albicans_SC5314:1865548-1864226C, translated using codon table 12 (440 amino acids) Verified ORF; Enolase; glycolysis and gluconeogenesis; major cell-surface antigen; binds host plasmin/plasminogen; immunoprotective; Hap43, phagocytosis induced; farnesol-repressed; flow model biofilm induced; Spider biofilm repressed; may be essential	47.2	440	5.81		12	13	502	40	13	24	0	0.508475	0.00726285
orf19.3499	orf19.3499 CGDID:CAL0005124 COORDS:Ca21chr6_C_albicans_SC5314:434456-434959W, translated using codon table 12 (167 amino acids) Uncharacterized ORF; Secreted potein; Hap43-repressed; fluconazole-induced; regulated by Tsa1, Tsa1B under H2O2 stress conditions; induced by Mnl1p under weak acid stress; Spider biofilm induced	18.3	167	5		4	4	112	34	4	9	0.003	0.491803	0.00702472
orf19.7421	CYP5 CGDID:CAL0005487 COORDS:Ca21chr3_C_albicans_SC5314:1455477-1454866C, translated using codon table 12 (203 amino acids) Verified ORF; Putative peptidyl-prolyl cis-trans isomerase; macrophage-downregulated protein level; protein level decrease in stationary phase cultures; predicted endoplasmic reticulum (ER) localization	22.4	203	6.95		6	6	175	37	6	11	0.009	0.491071	0.00701427
orf19.4311	YNK1 CGDID:CAL0000917 COORDS:Ca21chr5_C_albicans_SC5314:641794-642249W, translated using codon table 12 (151 amino acids) Verified ORF; Nucleoside diphosphate kinase (NDP kinase); homo-hexameric; soluble protein in hyphae; flucytosine induced; biofilm induced; macrophage-induced protein; stationary phase enriched protein; Spider biofilm repressed	16.9	151	6.57		3	6	133	42	6	8	0.007	0.473373	0.00676147
orf19.2706	CRH11 CGDID:CAL0004169 COORDS:Ca21chr4_C_albicans_SC5314:600732-599371C, translated using codon table 12 (453 amino acids) Verified ORF; GPI-anchored cell wall transglycosylase, putative ortholog of S. cerevisiae Crh1p; predicted glycosyl hydrolase domain; similar to Csf4p and to antigenic A. fumigatus Aspf9; predicted Kex2p substrate; caspofungin-induced	46.7	453	4.96		11	11	432	28	11	22	0	0.471092	0.00672889
orf19.5063	COI1 CGDID:CAL0001718 COORDS:Ca21chr1_C_albicans_SC5314:1722918-1723493W, translated using codon table 12 (191 amino acids) Verified ORF; Secreted protein; ciclopirox olamine induced; regulated by Ssn6; induced by nitric oxide independent of Yhb1; Hap43-induced; Spider biofilm repressed	21.3	191	6.62		6	6	160	31	6	10	0.009	0.469484	0.00670592
orf19.4975	HYR1 CGDID:CAL0006398 COORDS:Ca21chr1_C_albicans_SC5314:2944794-2947553W, translated using codon table 12 (919 amino acids) Verified ORF; GPI-anchored hyphal cell wall protein; macrophage-induced; repressed by neutrophils; resistance to killing by neutrophils, azoles; regulated by Rfg1, Efg1, Nrg1, Tup1, Cyr1, Bcr1, Hap43; Spider and flow model biofilm induced	91.8	919	4.65		0	11	609	17	11	42	0	0.457516	0.00653498
orf19.1816	ALS3 CGDID:CAL0001605 COORDS:Ca21chrR_C_albicans_SC5314:1535813-1532346C, translated using codon table 12 (1155 amino acids) Verified ORF; Cell wall adhesin; epithelial adhesion, endothelial invasion; alleles vary in adhesiveness; immunoprotective in mice; binds SspB adhesin of S. gordonii in mixed biofilm; induced in/required for Spider biofilm; flow model biofilm repressed	123.7	1155	4.55		0	6	1024	8	7	53	0	0.428456	0.00611989
orf19.3895	CHT2 CGDID:CAL0002204 COORDS:Ca21chr5_C_albicans_SC5314:921556-919805C, translated using codon table 12 (583 amino acids) Verified ORF; GPI-linked chitinase; required for normal filamentous growth; repressed in core caspofungin response; fluconazole, Cyr1, Efg1, pH-regulated; mRNA binds She3 and is localized to yeast-form buds and hyphal tips; Spider biofilm repressed	60.8	583	4.86		0	10	305	29	10	26	0	0.427632	0.00610812
orf19.1671	UTR2 CGDID:CAL0000104 COORDS:Ca21chr3_C_albicans_SC5314:377816-376404C, translated using codon table 12 (470 amino acids) Verified ORF; Putative GPI anchored cell wall glycosidase; role in adhesion, hyphal growth on Spider (not serum) medium; chitin-binding, glycosyl hydrolase domains; induced during cell wall regeneration; mRNA in yeast-form cells; Spider biofilm induced	51.7	470	4.73		10	10	322	24	10	21	0	0.40619	0.00580185
orf19.4565	BGL2 CGDID:CAL0002830 COORDS:Ca21chr4_C_albicans_SC5314:445653-444727C, translated using codon table 12 (308 amino acids) Verified ORF; Cell wall 1,3-beta-glucosyltransferase; mutant has cell-wall and growth defects, but wild-type 1,3- or 1,6-beta-glucan content; antigenic; virulence role in mouse systemic infection; rat catheter biofilm induced	33.6	308	4.75		0	5	270	17	5	13	0	0.386905	0.00552639
orf19.953.1	COF1 CGDID:CAF0006915 COORDS:Ca21chr5_C_albicans_SC5314:67605-68261W, translated using codon table 12 (141 amino acids) Uncharacterized ORF; Putative cofilin; macrophage-induced protein; protein present in exponential and stationary-phase yeast cells, but higher amounts in stationary phase	15.8	141	5.21		3	4	125	47	4	6	0.007	0.379747	0.00542415
orf19.5076	PFY1 CGDID:CAL0001759 COORDS:Ca21chr1_C_albicans_SC5314:1753657-1754037W, translated using codon table 12 (126 amino acids) Verified ORF; Profilin; functional homolog of S. cerevisiae Pfy1; hyphae, macrophage/pseudohyphal-induced; regulated by Nrg1, Tup1; gene lacks intron (unlike S. cerevisiae PFY1); complements growth of S. cerevisiae srv2 mutant; nonessential	13.8	126	5.45		0	4	92	60	4	5	0.004	0.362319	0.00517522
orf19.6745	TPI1 CGDID:CAL0004861 COORDS:Ca21chr3_C_albicans_SC5314:1702071-1702817W, translated using codon table 12 (248 amino acids) Verified ORF; Triose-phosphate isomerase; antigenic in mouse/human; mutation affects filamentation; macrophage-repressed; protein in exponential and stationary growth phase yeast; possibly essential; flow model biofilm induced; Spider biofilm repressed	26.6	248	6.01		5	5	179	26	5	9	0	0.338346	0.0048328
orf19.903	GPM1 CGDID:CAL0003574 COORDS:Ca21chr2_C_albicans_SC5314:675910-676656W, translated using codon table 12 (248 amino acids) Verified ORF; Phosphoglycerate mutase; surface protein that binds host complement Factor H and FHL-1; antigenic; fluconazole, or amino acid starvation (3-AT) induced, farnesol-repressed; Hap43, flow model biofilm induced; Spider biofilm repressed	27.4	248	6.16		6	6	153	33	6	9	0	0.328467	0.00469169
orf19.3268	TMA19 CGDID:CAL0003369 COORDS:Ca21chrR_C_albicans_SC5314:198468-197965C, translated using codon table 12 (167 amino acids) Uncharacterized ORF; Cell wall protein, ortholog of S. cerevisiae Tma19p (Ykl065cp)	18.5	167	4.46		3	3	125	22	3	6	0.002	0.324324	0.00463252
orf19.7417	TSA1 CGDID:CAL0005458 COORDS:Ca21chr3_C_albicans_SC5314:1406632-1406042C, translated using codon table 12 (196 amino acids) Verified ORF; TSA/alkyl hydroperoxide peroxidase C (AhPC) family protein; similar to thiol-dependent peroxidases of oxidative stress signaling; antigenic; hyphal surface, nucleus; yeast-form nucleus, cytoplasm; biofilm, phagocytosis, peroxide induced	21.8	196	5.06		3	4	165	29	5	7	0.009	0.321101	0.00458648
orf19.4135	PRC2 CGDID:CAL0005673 COORDS:Ca21chr5_C_albicans_SC5314:322744-324240W, translated using codon table 12 (498 amino acids) Uncharacterized ORF; Putative carboxypeptidase; induced by human neutrophils; Spider biofilm induced	56.3	498	4.93		13	13	348	32	13	17	0	0.301954	0.00431299
Q59SF7	Cell wall mannoprotein PIR1 OS=Candida albicans (strain SC5314 / ATCC MYA-2876) OX=237561 GN=PIR1 PE=1 SV=2	40.6	385	5.29		0	3	169	15	3	12	0.006	0.295567	0.00422175
orf19.4879.2	NTF2 CGDID:CAF0007025 COORDS:Ca21chr1_C_albicans_SC5314:2212873-2212390C, translated using codon table 12 (124 amino acids) Uncharacterized ORF; Putative nuclear envelope protein; regulated by Ssn6; rat catheter biofilm repressed	14.2	124	4.63		3	3	104	26	3	4	0.003	0.28169	0.00402355
orf19.6814	TDH3 CGDID:CAL0005657 COORDS:Ca21chr3_C_albicans_SC5314:1574973-1575980W, translated using codon table 12 (335 amino acids) Verified ORF; NAD-linked glyceraldehyde-3-phosphate dehydrogenase; binds fibronectin, laminin; at cell surface; antigenic in infection; farnesol-repressed; stationary phase-enriched; GlcNAc-induced; flow model biofilm induced; Spider biofilm repressed	35.8	335	7.12		6	8	175	38	9	10	0	0.27933	0.00398983
orf19.2937	PMM1 CGDID:CAL0006021 COORDS:Ca21chr1_C_albicans_SC5314:524030-524788W, translated using codon table 12 (252 amino acids) Verified ORF; Phosphomannomutase; enzyme of O- and N-linked mannosylation; interconverts mannose-6-phosphate and mannose-l-phosphate; functional homolog of S. cerevisiae Sec53; antigenic in mice; Hap43-induced; flow model and Spider biofilm repressed	29	252	5.69		8	8	162	35	8	8	0	0.275862	0.0039403
orf19.3014	BMH1 CGDID:CAL0001346 COORDS:Ca21chr1_C_albicans_SC5314:675939-675145C, translated using codon table 12 (264 amino acids) Verified ORF; Sole 14-3-3 protein in C. albicans; role in hyphal growth; possibly regulated by host interaction; localizes to yeast-form cell surface, not hyphae; alternatively spliced 5' UTR intron; Spider biofilm repressed	29.5	264	4.81		5	6	154	30	6	8	0.007	0.271186	0.00387352
orf19.4530.1	orf19.4530.1 CGDID:CAF0007014 COORDS:Ca21chr1_C_albicans_SC5314:400609-401995W, translated using codon table 12 (366 amino acids) Uncharacterized ORF; Protein of unknown function; regulated by Nrg1, Tup1; Spider and flow model biofilm induced	40.6	366	4.84		6	6	113	23	6	11	0	0.270936	0.00386994
orf19.7611	TRX1 CGDID:CAL0000819 COORDS:Ca21chrR_C_albicans_SC5314:2210638-2210327C, translated using codon table 12 (103 amino acids) Verified ORF; Thioredoxin; involved in response to reactive oxygen species; biofilm, benomyl, flucytosine, peroxide, Hap43 induced; amphotericin B, caspofungin repressed; induced by human neutrophils; macrophage-repressed gene	11.5	103	5.06		2	2	51	17	2	3	0.001	0.26087	0.00372616
orf19.1490	MSB2 CGDID:CAL0004775 COORDS:Ca21chr2_C_albicans_SC5314:327699-331928W, translated using codon table 12 (1409 amino acids) Verified ORF; Mucin family adhesin-like protein; cell wall damage sensor; required for Cek1 phosphorylation by cell wall stress; Rim101-repressed; activation releases extracellular domain into medium; Spider biofilm induced	141	1409	4.04		7	7	794	9	7	36	0	0.255319	0.00364688
orf19.2060	SOD5 CGDID:CAL0004456 COORDS:Ca21chr2_C_albicans_SC5314:112012-111326C, translated using codon table 12 (228 amino acids) Verified ORF; Cu and Zn-containing superoxide dismutase; protects against oxidative stress; induced by neutrophils, hyphal growth, caspofungin, osmotic/oxidative stress; oralpharyngeal candidiasis induced; rat catheter and Spider biofilm induced	23.6	228	6.87		3	3	218	17	3	6	0.008	0.254237	0.00363142
orf19.6673	HEX1 CGDID:CAL0004108 COORDS:Ca21chr5_C_albicans_SC5314:805379-807067W, translated using codon table 12 (562 amino acids) Verified ORF; Beta-N-acetylhexosaminidase/chitobiase, highly glycosylated enzyme that is secreted to the periplasm and culture medium; required for full virulence; may have role in carbon or nitrogen scavenging; possibly an essential gene (UAU1 method)	63.4	562	5.53		0	11	202	29	11	15	0	0.236593	0.0033794
orf19.3829	PHR1 CGDID:CAL0002002 COORDS:Ca21chr4_C_albicans_SC5314:972261-970615C, translated using codon table 12 (548 amino acids) Verified ORF; Cell surface glycosidase; may act on cell-wall beta-1,3-glucan prior to beta-1,6-glucan linkage; role in systemic, not vaginal virulence (neutral, not low pH); high pH or filamentation induced; Bcr1-repressed in RPMI a/a biofilm	59.5	548	5.07		0	11	298	22	12	14	0	0.235294	0.00336085
orf19.4688	DAG7 CGDID:CAL0003828 COORDS:Ca21chr4_C_albicans_SC5314:200233-199478C, translated using codon table 12 (251 amino acids) Verified ORF; Secretory protein; a-specific, alpha-factor induced; mutation confers hypersensitivity to toxic ergosterol analog; fluconazole-induced; induced during chlamydospore formation in C. albicans and C. dubliniensis	26.3	251	4.51		4	4	94	16	4	6	0.002	0.228137	0.00325862
orf19.3590	IPP1 CGDID:CAL0006016 COORDS:Ca21chr2_C_albicans_SC5314:1791316-1790450C, translated using codon table 12 (288 amino acids) Verified ORF; Putative inorganic pyrophosphatase; antigenic; soluble protein in hyphae; macrophage-induced protein; protein present in exponential and stationary phase yeast; possibly essential (UAU1 method); sumoylation target; Spider biofilm repressed	32.1	288	5.26		0	6	157	34	6	7	0	0.218069	0.0031148
orf19.7218	RBE1 CGDID:CAL0003775 COORDS:Ca21chr1_C_albicans_SC5314:3109061-3108246C, translated using codon table 12 (271 amino acids) Verified ORF; Pry family cell wall protein; Rim101, Efg1, Ssn6, alkaline repressed; O-glycosylation; no GPI anchor predicted; ketoconazol induced; regulated by Sef1, Sfu1, Hap4; flow model biofilm induced; rat catheter and Spider biofilm repressed	29.1	271	5.08		3	3	187	16	3	6	0	0.206186	0.00294507
orf19.7043.1	ACB1 CGDID:CAF0007094 COORDS:Ca21chr7_C_albicans_SC5314:143529-143912W, translated using codon table 12 (86 amino acids) Uncharacterized ORF; Protein similar to a region of acyl-coenzyme-A-binding protein; amphotericin B repressed; regulated by Nrg1, Tup1; Hap43-induced	9.9	86	4.92		2	2	36	20	2	2	0.004	0.20202	0.00288558
orf19.3053	orf19.3053 CGDID:CAL0001432 COORDS:Ca21chr1_C_albicans_SC5314:739753-739208C, translated using codon table 12 (181 amino acids) Uncharacterized ORF; Protein of unknown function; present in exponential and stationary phase yeast; identified in extracts from biofilm and planktonic cells; flow model biofilm induced gene; GlcNAc-induced protein	20.3	181	5.26		3	3	132	22	3	4	0.003	0.197044	0.0028145
orf19.5130	PDI1 CGDID:CAL0002547 COORDS:Ca21chr7_C_albicans_SC5314:707309-705627C, translated using codon table 12 (560 amino acids) Verified ORF; Putative protein disulfide-isomerase; antigenic in human infection; soluble protein in hyphae; induced by filamentous growth; protein present in exponential and stationary growth phase yeast cultures; flow model biofilm repressed	63	560	4.74		11	11	163	21	11	12	0	0.190476	0.00272069
orf19.2947	SNZ1 CGDID:CAL0006040 COORDS:Ca21chr1_C_albicans_SC5314:542657-541779C, translated using codon table 12 (292 amino acids) Verified ORF; Stationary phase protein; vitamin B synthesis; induced byyeast-hypha switch, 3-AT or in azole-resistant strain overexpressing MDR1; soluble in hyphae; regulated by Gcn4, macrophage; Spider biofilm induced; rat catheter biofilm repressed	31.8	292	6.01		5	5	110	16	5	6	0	0.188679	0.00269502
orf19.3911	SAH1 CGDID:CAL0002855 COORDS:Ca21chr5_C_albicans_SC5314:947362-946010C, translated using codon table 12 (450 amino acids) Uncharacterized ORF; S-adenosyl-L-homocysteine hydrolase; sulfur amino acid metabolism; antigenic in human; alkaline-, fluconazole-induced expression; Gcn4-regulated; amino acid starvation (3-AT) repressed; flow model biofilm induced; Spider biofilm repressed	49	450	5.59		8	9	144	21	9	9	0	0.183673	0.00262352
orf19.4618	FBA1 CGDID:CAL0003619 COORDS:Ca21chr4_C_albicans_SC5314:347099-346020C, translated using codon table 12 (359 amino acids) Verified ORF; Fructose-bisphosphate aldolase; glycolytic enzyme; antigenic in murine/human infection; regulated by yeast-hypha switch; induced by Efg1, Gcn4, Hog1, fluconazole; phagocytosis-repressed; flow model biofilm induced; Spider biofilm repressed	39.2	359	6.06		7	7	100	20	6	7	0	0.178571	0.00255064
orf19.7111.1	SOD3 CGDID:CAL0006719 COORDS:Ca21chr7_C_albicans_SC5314:15982-16662W, translated using codon table 12 (206 amino acids) Verified ORF; Cytosolic manganese-containing superoxide dismutase; protects against oxidative stress; repressed by ciclopirox olamine, induced during stationary phase when SOD1 expression is low; Hap43-repressed; Spider and flow model biofilm induced	22.7	206	7.31		2	2	91	9	2	4	0.002	0.176211	0.00251693
orf19.704	SOL3 CGDID:CAL0001702 COORDS:Ca21chrR_C_albicans_SC5314:1441728-1440949C, translated using codon table 12 (259 amino acids) Uncharacterized ORF; Putative 6-phosphogluconolactonase; present in exponential and stationary growth phase yeast cultures; macrophage-downregulated protein; Spider biofilm repressed	28.5	259	5.53		5	5	93	22	5	5	0.003	0.175439	0.0025059
O42779	Candidapepsin-9 OS=Candida albicans OX=5476 GN=SAP9 PE=3 SV=1	58.6	544	5.25		0	5	210	10	5	10	0	0.170648	0.00243747
orf19.5024	GND1 CGDID:CAL0001618 COORDS:Ca21chr1_C_albicans_SC5314:3048182-3045995C, translated using codon table 12 (495 amino acids) Verified ORF; 6-phosphogluconate dehydrogenase; soluble in hyphae; farnesol, macrophage-induced protein; antigenic in mice; dual localization to cytosol and peroxisomes depends on alternative splicing; rat catheter and Spider biofilm repressed	54.3	495	6.09		7	8	191	19	8	9	0	0.165746	0.00236745
orf19.1770	CYC1 CGDID:CAL0000927 COORDS:Ca21chr2_C_albicans_SC5314:2074774-2075106W, translated using codon table 12 (110 amino acids) Verified ORF; Cytochrome c; complements defects of S. cerevisiae cyc1 cyc7 double mutant; induced in high iron; alkaline repressed; repressed by nitric oxide; Hap43-dependent repression in low iron; regulated by Sef1, Sfu1	12.2	110	9.66		2	2	0	19	2	2	0.002	0.163934	0.00234157
orf19.4427	SKP1 CGDID:CAL0001786 COORDS:Ca21chr1_C_albicans_SC5314:1605009-1604515C, translated using codon table 12 (164 amino acids) Uncharacterized ORF; Putative subunit D of kinetochore protein complex CBF3; regulated by Gcn4p; repressed in response to amino acid starvation (3-aminotriazole treatment)	19	164	4.7		2	3	20	21	3	3	0.002	0.157895	0.00225531
orf19.6452	RBP1 CGDID:CAL0002227 COORDS:Ca21chr7_C_albicans_SC5314:553012-552638C, translated using codon table 12 (124 amino acids) Verified ORF; Peptidyl-prolyl cis-trans isomerase; rapamycin-binding protein; homozygous null mutation confers rapamycin resistance; regulated by Gcn4p; macrophage-induced protein; repressed in response to 3-AT; functional homolog of S. cerevisiae Rbp1p	13.3	124	7.18		2	2	42	22	2	2	0.002	0.150376	0.00214791
orf19.542	HXK2 CGDID:CAL0000198 COORDS:Ca21chrR_C_albicans_SC5314:995402-996856W, translated using codon table 12 (484 amino acids) Uncharacterized ORF; Hexokinase II; antigenic in humans; repressed by human neutrophils; Efg1-regulated; fluconazole-induced; gene regulation by Ssn6; present in exponential and stationary growth phase; flow model biofilm induced; Spider biofilm repressed	53.4	484	5.55		7	7	163	14	7	8	0	0.149813	0.00213987
orf19.2769	orf19.2769 CGDID:CAL0004259 COORDS:Ca21chr4_C_albicans_SC5314:463682-464065W, translated using codon table 12 (127 amino acids) Uncharacterized ORF; Putative protease B inhibitor; hyphal-induced expression; Cyr1p- and Ras1p-repressed	13.6	127	8.12		2	2	73	20	2	2	0.002	0.147059	0.00210053
orf19.2877	PDC11 CGDID:CAL0005202 COORDS:Ca21chr4_C_albicans_SC5314:1469944-1468241C, translated using codon table 12 (567 amino acids) Verified ORF; Pyruvate decarboxylase; antigenic; on hyphal not yeast cell surface; Hap43, Gcn4, Efg1, Efh1, Hsf1 regulated; fluconazole, farnesol induced; amino acid starvation repressed; flow model biofilm induced; Spider biofilm repressed	62.4	567	5.58		7	7	133	16	6	9	0	0.144231	0.00206013
P29717	Glucan 1,3-beta-glucosidase OS=Candida albicans (strain SC5314 / ATCC MYA-2876) OX=237561 GN=XOG1 PE=1 SV=5	50	438	5.64		7	7	162	22	6	7	0	0.14	0.0019997
orf19.6081	PHR2 CGDID:CAL0005209 COORDS:Ca21chr1_C_albicans_SC5314:37852-39486W, translated using codon table 12 (544 amino acids) Verified ORF; Glycosidase; role in vaginal not systemic infection (low pH not neutral); low pH, high iron, fluconazole, Hap43-induced; Rim101-repressed at pH8; rat catheter biofilm induced; Bcr1-repressed in RPMI a/a biofilms	58.7	544	4.64		4	4	187	12	5	8	0.009	0.136286	0.00194666
orf19.4309	GRP2 CGDID:CAL0000895 COORDS:Ca21chr5_C_albicans_SC5314:640030-639005C, translated using codon table 12 (341 amino acids) Verified ORF; Methylglyoxal reductase; regulation associated with azole resistance; induced in core stress response or by oxidative stress via Cap1, fluphenazine, benomyl, by Hap43 or with long term fluconazole treatment; Spider biofilm induced	37.6	341	6.44		4	4	127	16	4	5	0.006	0.132979	0.00189942
orf19.5342	orf19.5342 CGDID:CAL0004311 COORDS:Ca21chr2_C_albicans_SC5314:2190842-2192530W, translated using codon table 12 (562 amino acids) Uncharacterized ORF; Protein of unknown function	64.6	562	6.7		6	6	90	13	6	8	0.009	0.123839	0.00176887
orf19.3839	SAP10 CGDID:CAL0002041 COORDS:Ca21chr4_C_albicans_SC5314:961014-962375W, translated using codon table 12 (453 amino acids) Verified ORF; Secreted aspartyl protease; roles in adhesion, virulence (RHE model), cell surface integrity; distinct specificity from Sap9; at cell membrane and wall; GPI-anchored; induced in low iron; Tbf1-activated; Spider biofilm induced	49.3	453	4.51		3	3	141	8	3	6	0.003	0.121704	0.00173837
orf19.4952.1	orf19.4952.1 CGDID:CAF0007028 COORDS:Ca21chr1_C_albicans_SC5314:2893446-2894008W, translated using codon table 12 (151 amino acids) Uncharacterized ORF; Protein of unknown function	16.5	151	4.96		2	2	27	15	2	2	0.002	0.121212	0.00173135
orf19.1442	PLB4.5 CGDID:CAL0004588 COORDS:Ca21chr2_C_albicans_SC5314:241143-243251W, translated using codon table 12 (702 amino acids) Verified ORF; Phospholipase B; Hog1-induced; regulated by Ssn6; putative GPI-anchor; repressed during cell wall regeneration; clade-associated gene expression; Hap43-induced; rat catheter and Spider biofilm repressed	77	702	5.29		8	8	186	17	8	9	0	0.116883	0.00166951
orf19.6906	ASC1 CGDID:CAL0000124 COORDS:Ca21chr7_C_albicans_SC5314:257914-259126W, translated using codon table 12 (317 amino acids) Verified ORF; 40S ribosomal subunit similar to G-beta subunits; glucose or N starvation induced filamentation; required for virulence in mice; snoRNA snR24 encoded in ASC1 intron; repressed in stationary phase; GlcNAc-induced; Spider biofilm repressed	34.5	317	6.54		4	4	119	16	4	4	0.009	0.115942	0.00165607
orf19.5925	orf19.5925 CGDID:CAL0003301 COORDS:Ca21chr3_C_albicans_SC5314:989156-990289W, translated using codon table 12 (377 amino acids) Uncharacterized ORF; Protein of unknown function	43.5	377	4.97		4	4	149	16	4	5	0.009	0.114943	0.00164179
orf19.2952	EXG2 CGDID:CAL0006050 COORDS:Ca21chr1_C_albicans_SC5314:552433-550994C, translated using codon table 12 (479 amino acids) Verified ORF; GPI-anchored cell wall protein, similar to S. cerevisiae exo-1,3-beta-glucosidase Exg2p; predicted Kex2p substrate; induced during cell wall regeneration; possibly an essential gene, disruptants not obtained by UAU1 method; Hap43p-repressed	54.5	479	5.53		0	6	167	13	6	6	0.004	0.110092	0.00157251
orf19.5585	SAP5 CGDID:CAL0006261 COORDS:Ca21chr6_C_albicans_SC5314:635336-636592W, translated using codon table 12 (418 amino acids) Verified ORF; Secreted aspartyl proteinase; sap4,5,6 triple null defective in utilization of protein as N source; virulence role effected by URA3; expressed during infection; mRNA localized to hyphal tip via She3; rat catheter and Spider biofilm induced	45.6	418	6.38		4	4	97	11	4	5	0.003	0.109649	0.00156618
orf19.2269	orf19.2269 CGDID:CAL0006325 COORDS:Ca21chr2_C_albicans_SC5314:1457877-1458614W, translated using codon table 12 (245 amino acids) Uncharacterized ORF; Putative 3-phosphoserine phosphatase; induced by benomyl or in azole-resistant strain that overexpresses MDR1; early-stage flow model biofilm induced; Spider biofilm repressed	27.7	245	4.83		3	3	79	11	3	3	0.002	0.108303	0.00154696
orf19.6481	YPS7 CGDID:CAL0002302 COORDS:Ca21chr7_C_albicans_SC5314:497855-499960W, translated using codon table 12 (701 amino acids) Verified ORF; Putative aspartic-type endopeptidase with limited ability to degrade alpha pheromone; mutants show increased sensitivity to alpha pheromone	75.8	701	4.82		6	6	91	9	6	8	0	0.105541	0.0015075
orf19.6414.3	TPM2 CGDID:CAF0007078 COORDS:Ca21chrR_C_albicans_SC5314:1826988-1827860W, translated using codon table 12 (161 amino acids) Uncharacterized ORF; Putative tropomyosin isoform 2; regulated by Gcn4; repressed by amino acid starvation; macrophage-induced; protein levels decrease in stationary cells; Hap43-induced; rat catheter and Spider biofilm repressed	19	161	4.58		2	2	53	9	2	2	0.002	0.105263	0.00150354
orf19.7324	THI13 CGDID:CAL0004576 COORDS:Ca21chrR_C_albicans_SC5314:1972365-1973384W, translated using codon table 12 (339 amino acids) Verified ORF; Thiamin pyrimidine synthase; synthesis of the thiamine precursor hydroxymethylpyrimidine phosphate; single-turnover enzyme that provides histidine for HMP-P formation; induced by nitric oxide independent of Yhb1; Spider biofilm induced	38.3	339	5.94		4	4	93	11	4	4	0.002	0.104439	0.00149176
orf19.5858	EGD2 CGDID:CAL0002387 COORDS:Ca21chr3_C_albicans_SC5314:865678-865142C, translated using codon table 12 (178 amino acids) Verified ORF; Nascent polypeptide associated complex protein alpha subunit; soluble protein in hyphae; macrophage/pseudohyphal-induced; protein level decrease in stationary phase cultures; GlcNAc-induced protein; Spider biofilm repressed	19.5	178	4.82		2	2	30	17	2	2	0.003	0.102564	0.00146498
orf19.100	orf19.100 CGDID:CAL0002961 COORDS:Ca21chr6_C_albicans_SC5314:195350-194298C, translated using codon table 12 (350 amino acids) Uncharacterized ORF; Alpha/beta hydrolase and lipase domain protein; Hap43-repressed; Spider and flow model biofilm induced	40.5	350	5.64		4	4	79	11	4	4	0.002	0.0987654	0.00141073
orf19.3888	PGI1 CGDID:CAL0002184 COORDS:Ca21chrR_C_albicans_SC5314:1344847-1343195C, translated using codon table 12 (550 amino acids) Uncharacterized ORF; Glucose-6-phosphate isomerase; enzyme of glycolysis; antigenic; Efg1-regulated; induced upon adherence to polystyrene; repressed by phagocytosis, human neutrophils; flow model biofilm induced; rat catheter and Spider biofilm repressed	61.1	550	6.4		5	5	213	10	5	6	0	0.0981997	0.00140265
orf19.2241	PST1 CGDID:CAL0006260 COORDS:Ca21chr2_C_albicans_SC5314:1413266-1412670C, translated using codon table 12 (198 amino acids) Uncharacterized ORF; Putative 1,4-benzoquinone reductase; hyphal-induced; regulated by Cyr1, Ras1, Efg1, Nrg1, Rfg1, Tup1; Hap43-induced; Spider biofilm induced	21.1	198	6.64		2	2	60	9	2	2	0.002	0.0947867	0.0013539
orf19.2775	IDI1 CGDID:CAL0004272 COORDS:Ca21chr4_C_albicans_SC5314:450184-451038W, translated using codon table 12 (284 amino acids) Uncharacterized ORF; Protein of unknown function	32.3	284	4.97		3	3	76	11	3	3	0.002	0.0928793	0.00132665
orf19.113	CIP1 CGDID:CAL0002993 COORDS:Ca21chr6_C_albicans_SC5314:210363-209464C, translated using codon table 12 (299 amino acids) Verified ORF; Possible oxidoreductase; transcript induced by cadmium but not other heavy metals, heat shock, yeast-hypha switch, oxidative stress (via Cap1), or macrophage interaction; stationary phase enriched protein; Spider biofilm induced	33	299	5.14		3	3	61	13	3	3	0.002	0.0909091	0.00129851
orf19.5968	RDI1 CGDID:CAL0003409 COORDS:Ca21chr3_C_albicans_SC5314:1075120-1075731W, translated using codon table 12 (203 amino acids) Verified ORF; Putative rho GDP dissociation inhibitor; transposon mutation affects filamentous growth; farnesol, filament-induced; regulated by Nrg1, Tup1; protein levels low in stationary phase yeast	22.9	203	5.29		2	2	57	12	2	2	0.002	0.0873362	0.00124748
orf19.7469	ARG1 CGDID:CAL0005634 COORDS:Ca21chrR_C_albicans_SC5314:151128-149878C, translated using codon table 12 (416 amino acids) Verified ORF; Argininosuccinate synthase; arginine synthesis; Gcn4, Rim101 regulated; induced by amino acid starvation (3-AT), benomyl treatment; stationary phase enriched protein; repressed in alkalinizing medium; rat catheter, Spider biofilm induced	46.1	416	5.16		3	3	57	7	3	4	0.003	0.0867679	0.00123936
orf19.7585	INO1 CGDID:CAL0000215 COORDS:Ca21chrR_C_albicans_SC5314:2157196-2155634C, translated using codon table 12 (520 amino acids) Verified ORF; Inositol-1-phosphate synthase; antigenic in human; repressed by farnesol in biofilm or by caspofungin; upstream inositol/choline regulatory element; glycosylation predicted; rat catheter, flow model induced; Spider biofilm repressed	57.7	520	5.54		5	5	127	9	5	5	0.003	0.0866551	0.00123775
orf19.3465	RPL10A CGDID:CAL0005037 COORDS:Ca21chr6_C_albicans_SC5314:466025-465372C, translated using codon table 12 (217 amino acids) Uncharacterized ORF; Predicted ribosomal protein; downregulated upon phagocytosis by murine macrophages; Hap43-induced; Spider biofilm repressed	24.4	217	9.76		2	2	34	10	2	2	0.002	0.0819672	0.00117079
orf19.2681	RBT7 CGDID:CAL0003529 COORDS:Ca21chr4_C_albicans_SC5314:646919-647896W, translated using codon table 12 (325 amino acids) Uncharacterized ORF; Protein with similarity to RNase T2 enzymes; has putative secretion signal; expression is Tup1-repressed	36.8	325	5.08		3	3	67	10	3	3	0.002	0.0815217	0.00116442
P43067	Alcohol dehydrogenase 1 OS=Candida albicans OX=5476 GN=ADH1 PE=1 SV=1	36.9	350	6.44		0	3	34	10	3	3	0.002	0.0813008	0.00116127
orf19.5760	IHD1 CGDID:CAL0001488 COORDS:Ca21chr6_C_albicans_SC5314:839640-838462C, translated using codon table 12 (392 amino acids) Uncharacterized ORF; GPI-anchored protein; alkaline, hypha-induced; regulated by Nrg1, Rfg1, Tup1 and Tsa1, Tsa1B in minimal media at 37; oralpharyngeal candidasis induced ; Spider biofilm induced; regulated in Spider biofilms by Tec1, Efg1, Ndt80, Rob1, Brg1	36.9	392	4.34		2	2	70	8	2	3	0.003	0.0813008	0.00116127
orf19.1085	orf19.1085 CGDID:CAL0001253 COORDS:Ca21chr6_C_albicans_SC5314:946663-947361W, translated using codon table 12 (232 amino acids) Uncharacterized ORF; Protein of unknown function	25.4	232	5.33		1	2	68	7	2	2	0.002	0.0787402	0.00112469
C4YNP4	Thiamine thiazole synthase OS=Candida albicans (strain WO-1) OX=294748 GN=THI4 PE=3 SV=1	38.2	354	6.57		0	3	102	10	3	3	0.003	0.078534	0.00112175
orf19.4477	CSH1 CGDID:CAL0001962 COORDS:Ca21chr1_C_albicans_SC5314:845857-844844C, translated using codon table 12 (337 amino acids) Verified ORF; Aldo-keto reductase; role in fibronectin adhesion, cell surface hydrophobicity; regulated by temperature, growth phase, benomyl, macrophage interaction; azole resistance associated; Spider biofilm induced; rat catheter biofilm repressed	38.2	337	6.34		3	3	67	9	3	3	0.002	0.078534	0.00112175
orf19.3765	RAX2 CGDID:CAL0001245 COORDS:Ca21chr1_C_albicans_SC5314:2729519-2733700W, translated using codon table 12 (1393 amino acids) Verified ORF; Plasma membrane protein involved in establishment of bud sites and linear direction of hyphal growth; filament induced, repressed by Rim101, Tup1; Hap43-induced; Spider biofilm induced	154.3	1393	4.79		10	10	247	10	10	11	0	0.0712897	0.00101827
O74226	Cell wall synthesis protein KRE9 OS=Candida albicans OX=5476 GN=KRE9 PE=3 SV=1	29.1	271	8.18		0	2	95	10	2	2	0.002	0.0687285	0.000981691
orf19.3324	TIF CGDID:CAL0004095 COORDS:Ca21chr1_C_albicans_SC5314:264681-263488C, translated using codon table 12 (397 amino acids) Uncharacterized ORF; Translation initiation factor; upregulated in highly virulent strain compared to less virulent strain; antigenic in human; flucytosine induced; downregulated upon phagocytosis by macrophages; Spider biofilm repressed	44.6	397	5.36		2	3	58	8	3	3	0.002	0.0672646	0.00096078
orf19.1891	APR1 CGDID:CAL0001825 COORDS:Ca21chr2_C_albicans_SC5314:1513476-1512217C, translated using codon table 12 (419 amino acids) Verified ORF; Vacuolar aspartic proteinase; transcript equivalent in yeast-form and mycelial cells but is elevated at lower growth temperatures; upregulated iby human neutrophils; protein enriched in stationary phase; Spider biofilm induced	45.4	419	4.83		3	3	48	15	3	3	0.003	0.0660793	0.00094385
orf19.3910	orf19.3910 CGDID:CAL0002852 COORDS:Ca21chr5_C_albicans_SC5314:944280-945521W, translated using codon table 12 (413 amino acids) Uncharacterized ORF; Protein of unknown function	45.7	413	6.51		3	3	93	7	3	3	0.002	0.0656455	0.000937654
orf19.2841	PGM2 CGDID:CAL0005135 COORDS:Ca21chrR_C_albicans_SC5314:644428-646110W, translated using codon table 12 (560 amino acids) Uncharacterized ORF; Ortholog of S. cerevisiae Pgm2; induced in planktonic culture; Tye7p-regulated; flow model biofilm induced; rat catheter biofilm repressed	61.8	560	5.38		4	4	81	9	4	4	0.003	0.0647249	0.000924505
orf19.2551	MET6 CGDID:CAL0002475 COORDS:Ca21chrR_C_albicans_SC5314:371056-368753C, translated using codon table 12 (767 amino acids) Verified ORF; Essential 5-methyltetrahydropteroyltriglutamate-homocysteine methyltransferase (cobalamin-independent methionine synthase); antigenic in murine/human systemic infection; heat shock, estrogen, GCN-induced; Spider biofilm repressed	85.6	767	5.6		5	5	93	8	5	5	0.004	0.0584112	0.000834323
orf19.4980	HSP70 CGDID:CAL0000006 COORDS:Ca21chr1_C_albicans_SC5314:2955762-2957732W, translated using codon table 12 (656 amino acids) Verified ORF; Putative hsp70 chaperone; role in entry into host cells; heat-shock, amphotericin B, cadmium, ketoconazole-induced; surface localized in yeast and hyphae; antigenic in host; farnesol-downregulated in biofilm; Spider biofilm induced	70.3	656	5.17		3	3	72	7	4	4	0.004	0.056899	0.000812723
orf19.999	GCA2 CGDID:CAL0003852 COORDS:Ca21chr1_C_albicans_SC5314:2335782-2332942C, translated using codon table 12 (946 amino acids) Verified ORF; Predicted extracellular glucoamylase; induced by ketoconazole; possibly essential, disruptants not obtained by UAU1 method; promotes biofilm matrix formation; Spider biofilm induced; Bcr1-induced in RPMI a/a biofilms	105.6	946	4.91		5	5	66	10	5	6	0.007	0.0568182	0.000811568
orf19.4215	FET34 CGDID:CAL0000100 COORDS:Ca21chr6_C_albicans_SC5314:78587-76710C, translated using codon table 12 (625 amino acids) Verified ORF; Multicopper ferroxidase; induced by low iron, ciclopirox olamine, ketoconazole, hypoxia; alkaline induced by Rim101; repressed in fluconazole-resistant isolate; Sfu1, Hog1 repressed; complements S. cerevisiae fet3; Spider biofilm induced	70.7	625	4.67		3	3	47	5	3	4	0.002	0.0565771	0.000808125
orf19.984	PHO8 CGDID:CAL0003811 COORDS:Ca21chr1_C_albicans_SC5314:2309139-2310647W, translated using codon table 12 (502 amino acids) Uncharacterized ORF; Putative repressible vacuolar alkaline phosphatase; Rim101-induced transcript; regulated by Tsa1, Tsa1B in minimal media at 37 deg; possibly adherence-induced	55	502	5.72		2	2	72	4	2	3	0.002	0.0545455	0.000779106
orf19.2013	KAR2 CGDID:CAL0004332 COORDS:Ca21chr2_C_albicans_SC5314:180800-182863W, translated using codon table 12 (687 amino acids) Verified ORF; Similar to Hsp70 family chaperones; role in translocation of proteins into the ER; induced in high iron; protein present in exponential and stationary growth phase yeast cultures; flow model and Spider biofilm repressed	74.5	687	4.94		2	2	108	9	4	4	0.01	0.0536913	0.000766905
orf19.2661	TLO34 CGDID:CAF0007105 COORDS:Ca21chr1_C_albicans_SC5314:1292869-1293864W, translated using codon table 12 (331 amino acids) Uncharacterized ORF; Non-telomeric member of a family of telomere-proximal genes of unknown function; predicted N-terminus is extended, relative to that of other family members; overlaps orf19.2662	37.3	331	5.4		0	2	41	8	2	2	0.002	0.0536193	0.000765877
orf19.6809	orf19.6809 CGDID:CAL0005628 COORDS:Ca21chr3_C_albicans_SC5314:1584183-1585151W, translated using codon table 12 (322 amino acids) Uncharacterized ORF; Putative phosphomutase-like protein; protein present in exponential and stationary growth phase yeast; Hap43-repressed; Spider biofilm repressed	37.3	322	5.47		2	2	53	7	2	2	0.002	0.0536193	0.000765877
orf19.4491	ERG20 CGDID:CAL0002030 COORDS:Ca21chr2_C_albicans_SC5314:958692-959747W, translated using codon table 12 (351 amino acids) Uncharacterized ORF; Putative farnesyl pyrophosphate synthetase involved in isoprenoid and sterol biosynthesis, based on similarity to S. cerevisiae Erg20p; likely to be essential for growth, based on an insertional mutagenesis strategy	40.7	351	4.94		2	2	63	7	2	2	0.002	0.04914	0.000701897
orf19.6037	ASM3 CGDID:CAL0005104 COORDS:Ca21chr1_C_albicans_SC5314:117320-119443W, translated using codon table 12 (707 amino acids) Uncharacterized ORF; Putative secreted acid sphingomyelin phosphodiesterase; possible Kex2 substrate; transcript increased in an azole-resistant strain that overexpresses MDR1; flow model biofilm induced; F-12/CO2 early biofilm induced	82.2	707	5.34		4	4	101	6	4	4	0.003	0.0486618	0.000695066
orf19.4871	ERO1 CGDID:CAL0005461 COORDS:Ca21chr1_C_albicans_SC5314:2199912-2201654W, translated using codon table 12 (580 amino acids) Uncharacterized ORF; Ortholog of S. cerevisiae Ero1; role in formation of disulfide bonds in the endoplasmic reticulum; fluconazole-induced; induced by Mnl1 under weak acid stress; Spider biofilm induced	66.9	580	5.14		3	3	60	6	3	3	0.002	0.044843	0.00064052
orf19.5542	SAP6 CGDID:CAL0006162 COORDS:Ca21chr6_C_albicans_SC5314:559567-558311C, translated using codon table 12 (418 amino acids) Verified ORF; Secreted aspartyl protease; expressed during hyphal growth, oral carriage, infection; sap4,5,6 triple mutant defective in protein utilization as N source; virulence role affecte by URA3; N-glycosylated; rat catheter biofilm induced	45.4	418	8.03		0	2	41	6	2	2	0.002	0.0440529	0.000629234
orf19.7239	MDG1 CGDID:CAL0003845 COORDS:Ca21chr1_C_albicans_SC5314:3150328-3148098C, translated using codon table 12 (660 amino acids) Uncharacterized ORF; Protein of unknown function	70.5	660	4.86	Met-loss+Acetyl [N-Term]; Acetyl [N-Term]	3	3	39	3	3	3	0.002	0.0425532	0.000607813
orf19.7517	CHT1 CGDID:CAL0006391 COORDS:Ca21chrR_C_albicans_SC5314:44739-43351C, translated using codon table 12 (462 amino acids) Verified ORF; Chitinase; putative N-terminal catalytic domain; has secretory signal sequence; lacks S/T region and N-glycosylation motifs of Chs2p and Chs3p; alkaline downregulated; expression not detected in yeast-form or hyphal cells	48.9	462	4.84		0	2	56	7	2	2	0.002	0.0408998	0.000584196
Q5AA33	Predicted GPI-anchored protein 45 OS=Candida albicans (strain SC5314 / ATCC MYA-2876) OX=237561 GN=PGA45 PE=1 SV=2	49	463	4.5		0	2	60	7	2	2	0.002	0.0408163	0.000583004
orf19.6119	orf19.6119 CGDID:CAL0005965 COORDS:Ca21chrR_C_albicans_SC5314:1620230-1618215C, translated using codon table 12 (671 amino acids) Uncharacterized ORF; Protein of unknown function; Spider biofilm repressed	75.4	671	5.94		3	3	60	5	3	3	0.002	0.0397878	0.000568313
O13359	Kexin OS=Candida albicans (strain WO-1) OX=294748 GN=KEX2 PE=3 SV=2	105.1	938	5.03		0	2	81	3	2	4	0.003	0.038059	0.000543619
orf19.5102	PLB5 CGDID:CAL0002487 COORDS:Ca21chr1_C_albicans_SC5314:1806443-1804179C, translated using codon table 12 (754 amino acids) Verified ORF; Putative GPI-linked phospholipase B, fungal-specific (no mammalian homolog); null mutation eliminates cell-associated phospholipase A2 activity and attenuates virulence; fluconazole-repressed; flow model biofilm repressed	81.3	754	4.75		0	2	87	3	2	3	0.003	0.0369004	0.00052707
orf19.3575	CDC19 CGDID:CAL0005977 COORDS:Ca21chr2_C_albicans_SC5314:1118746-1120260W, translated using codon table 12 (504 amino acids) Verified ORF; Pyruvate kinase at yeast cell surface; Gcn4/Hog1/GlcNAc regulated; Hap43/polystyrene adherence induced; repressed by phagocytosis/farnesol; hyphal growth role; stationary phase enriched; flow model biofilm induced; Spider biofilm repressed	55.4	504	6.99		2	2	70	3	2	2	0.002	0.0361011	0.000515653
orf19.4754	ZWF1 CGDID:CAL0004479 COORDS:Ca21chr1_C_albicans_SC5314:1954892-1953369C, translated using codon table 12 (507 amino acids) Verified ORF; Glucose-6-phosphate dehydrogenase; antigenic in mice; activity induced by O2 or oxidizing agents H2O2, menadione, macrophage; caspofungin repressed; induced in core stress response; regulated by Gcn2, Gcn4; rat catheter biofilm repressed	58.3	507	6.58		2	2	30	4	2	2	0.002	0.0343053	0.000490003
orf19.5741	ALS1 CGDID:CAL0001440 COORDS:Ca21chr6_C_albicans_SC5314:791472-795254W, translated using codon table 12 (1260 amino acids) Verified ORF; Cell-surface adhesin; adhesion, virulence, immunoprotective roles; band at hyphal base; Rfg1, Ssk1, Spider biofilm induced; flow model biofilm repressed; CAI-4 strain background effects; promoter bound Bcr1, Tec1, Efg1, Ndt80, and Brg1	132.8	1260	4.45		3	3	95	4	4	4	0.003	0.0301205	0.000430229
orf19.2677	orf19.2677 CGDID:CAL0003516 COORDS:Ca21chr4_C_albicans_SC5314:657654-659519W, translated using codon table 12 (621 amino acids) Uncharacterized ORF; Putative GPI transamidase component; possibly an essential gene, disruptants not obtained by UAU1 method	70.6	621	6.14		2	2	30	4	2	2	0.003	0.0283286	0.000404635
orf19.1327	RBT1 CGDID:CAL0003763 COORDS:Ca21chr4_C_albicans_SC5314:747433-745268C, translated using codon table 12 (721 amino acids) Verified ORF; Cell wall protein with similarity to Hwp1; required for virulence; predicted glycosylation; fluconazole, Tup1 repressed; farnesol, alpha factor, serum, hyphal and alkaline induced; Rfg1, Rim101-regulated	73.6	721	4.34		0	2	85	4	2	2	0.002	0.0271739	0.000388141
C4YJQ8	Elongation factor 2 OS=Candida albicans (strain WO-1) OX=294748 GN=EFT2 PE=3 SV=1	93.3	842	6.47		0	2	55	3	2	2	0.002	0.0214362	0.000306187
orf19.5292	AXL2 CGDID:CAL0003673 COORDS:Ca21chr4_C_albicans_SC5314:893170-890369C, translated using codon table 12 (933 amino acids) Uncharacterized ORF; Ortholog of S. cerevisiae Axl2; a plasma membrane protein involved in determination of budding pattern; O-glycosylated by Pmt4; mutant is viable	101.8	933	5.35		2	2	53	3	2	2	0.002	0.0196464	0.000280621
														70.0104
