# Supplementary material for: Mass Spectrometry-based Proteomic and Immunoproteomic Analyses of the Candida albicans Hyphal Secretome Reveal Diagnostic Biomarker Candidates for Invasive Candidiasis
Source: Preprints.org preprint supplement (doi:10.20944/preprints202105.0752.v1), 2021-05-31
Supplement: Supplementary file 1 [file supplementary › Table S5.xlsx]

## Sheet: Supplementary Table 5
Table S5. Comparison between proteins previously reported in the hyphal C. albicans secretome or biofilm EVs and our study.
										Comparison between the proteins uniquely found in our study and in a proteomic study of EV's of biofilms [42]
Secreted proteins previously described [32, 60, 63]	Proteins from our secretome bachs (S1,S2)	111 elements included exclusively in "S1S2":								Proteins from [42]	111 elements in "S1S2	63 elements included exclusively in "s1s2":
CR_08340W_A	C1_08500C_A	C7_00110W_A								C100160CA	C700110WA	C203090CA	C2_03090C_A	ADE8
C4_00160C_A	C6_00750C_A	CR_09240C_A								C100210CA	CR09240CA	C603230WA	C6_03230W_A	ARG3
C6_01910W_A	C6_03030W_A	C6_00850W_A								C100700WA	C600850WA	C703570WA	C7_03570W_A	ARG4
CR_00620C_A	C7_02380C_A	C6_01070C_A								C101010WA	C601070CA	C601070CA	C6_01070C_A	CIP1
C5_05050W_A	C4_01750C_A	C1_11650W_A								C101300WA	C111650WA	C406030WA	C4_06030W_A	CMD1
CR_06150C_A	C2_10030C_A	C4_06030W_A								C101360CA	C406030WA	C303010CA	C3_03010C_A	DTD2
C2_10110W_A	C1_13860C_A	C1_06370C_A								C101490WA	C106370CA	C101330CA	C1_01330C_A	DUT1
C2_09390W_A	C3_07440W_A	C1_11700C_A								C101530CA	C111700CA	C111650WA	C1_11650W_A	EGD1
C7_03670W_A	C3_06870W_A	CR_09290W_A								C102240WA	CR09290WA	C300200CA	C3_00200C_A	ETR1
C4_03470C_A	C3_06180C_A	C3_07340W_A								C102330CA	C307340WA	C113680CA	C1_13680C_A	GCV3
C2_02970C_A	C4_03470C_A	CR_10490W_A								C102650WA	CR10490WA	C307340WA	C3_07340W_A	GCY1
C1_03190C_A	C4_06980W_A	C7_03570W_A								C103310WA	C703570WA	C405140CA	C4_05140C_A	GDB1
C4_02900C_A	CR_03720W_A	CR_04530W_A								C103510CA	CR04530WA	C110450WA	C1_10450W_A	GLY1
CR_01690C_A	C2_05460W_A	C6_04280W_A								C103940WA	C604280WA	C503860WA	C5_03860W_A	HAM1
C4_02940W_A	CR_10350C_A	C1_01300W_A								C104200CA	C101300WA	C110780CA	C1_10780C_A	HNT1
C4_04170C_A	C1_07900W_A	C4_01770W_A								C104220CA	C401770WA	C502080CA	C5_02080C_A	HSP12
CR_10670W_A	C1_08030W_A	C6_03230W_A								C105490CA	C603230WA	C100140WA	C1_00140W_A	KEL1
C1_06940C_A	C3_06360C_A	C2_03090C_A								C105630CA	C203090CA	C700940WA	C7_00940W_A	KEX1
C3_06360C_A	CR_06340C_A	CR_04650W_A								C105720WA	CR04650WA	C108260CA	C1_08260C_A	LTP1
C5_04130C_A	C1_03220C_A	C2_10860C_A								C105890WA	C210860CA	C305190CA	C3_05190C_A	MCA1
C2_03100W_A	C2_03270W_A	C3_01420C_A								C106480CA	C301420CA	C114290CA	C1_14290C_A	MDG1
CR_07590W_A	CR_01620C_A	C2_09060C_A								C106890CA	C209060CA	C704040CA	C7_04040C_A	NPT1
C7_00750W_A	CR_04510W_A	C4_06620C_A								C107160CA	C406620CA	C604280WA	C6_04280W_A	orf19.1085
CR_09160C_A	C5_02890W_A	CR_00090C_A								C108050WA	CR00090CA	C209600CA	C2_09600C_A	orf19.1394
C1_10790W_A	C7_00110W_A	CR_09100C_A								C108080CA	CR09100CA	C301420CA	C3_01420C_A	orf19.1709
C4_04480C_A	C5_00370W_A	C1_01330C_A								C108110WA	C101330CA	CR04650WA	CR_04650W_A	orf19.1738.1
CR_00180C_A	C1_01350C_A	C2_09970C_A								C108180CA	C209970CA	C405390WA	C4_05390W_A	orf19.1796
C4_02250C_A	C4_07180W_A	C4_01510W_A								C109020WA	C401510WA	C200770WA	C2_00770W_A	orf19.2047
C6_03080C_A	C4_06570C_A	C1_10450W_A								C110170WA	C110450WA	C206890CA	C2_06890C_A	orf19.2244
C7_01250W_A	C5_04270C_A	CR_03520C_A								C110820CA	CR03520CA	C207070WA	C2_07070W_A	orf19.2262
C2_05460W_A	C5_02860C_A	C1_00220W_A								C111120CA	C100220WA	C406620CA	C4_06620C_A	orf19.2870
C1_10040W_A	C6_02240C_A	C2_06890C_A								C111670WA	C206890CA	C102430CA	C1_02430C_A	orf19.2930
C5_00370W_A	C1_02480W_A	C1_13680C_A								C111860WA	C113680CA	C504360CA	C5_04360C_A	orf19.3922
C1_13760W_A	C2_08810C_A	C3_07330W_A								C113030CA	C307330WA	C110280CA	C1_10280C_A	orf19.4898
C1_10940C_A	C1_04300C_A	C1_07840W_A								C113190WA	C107840WA	C107840WA	C1_07840W_A	orf19.5054
C1_04020C_A	C1_02590C_A	C1_12360C_A								C113270WA	C112360CA	CR04300WA	CR_04300W_A	orf19.518
C3_06250W_A	C7_02570C_A	C1_09490C_A								C113690CA	C109490CA	C112140WA	C1_12140W_A	orf19.5250
C5_01580C_A	C1_13480W_A	C4_04900W_A								C114460WA	C404900WA	C210860CA	C2_10860C_A	orf19.5369
C2_04310W_A	C2_10110W_A	C3_07220C_A								C114500CA	C307220CA	C304810CA	C3_04810C_A	orf19.5943.1
CR_07180W_A	C7_00750W_A	C5_03860W_A								C200360CA	C503860WA	C304920CA	C3_04920C_A	orf19.5961
C6_04130C_A	C1_03510C_A	C4_02070W_A								C200760CA	C402070WA	CR09670CA	CR_09670C_A	orf19.6596
CR_10110W_A	C4_02410C_A	C1_10700C_A								C201220WA	C110700CA	C307490WA	C3_07490W_A	orf19.6739
CR_03500W_A	C3_05000W_A	C1_14060W_A								C201320WA	C114060WA	C307330WA	C3_07330W_A	orf19.6758
C4_01010C_A	CR_10100C_A	C5_04360C_A								C201530CA	C504360CA	C306860CA	C3_06860C_A	orf19.6816
C3_05590C_A	C1_13940W_A	C3_04920C_A								C201690WA	C304920CA	C205590CA	C2_05590C_A	orf19.6872
C3_04950W_A	C1_02990C_A	C1_02240W_A								C202000WA	C102240WA	C700140CA	C7_00140C_A	orf19.7109
C3_06010W_A	C7_01250W_A	C5_02080C_A								C202170WA	C502080CA	C703860WA	C7_03860W_A	orf19.7196
C1_03680W_A	C1_03190C_A	C1_02600W_A								C202310WA	C102600WA	C114060WA	C1_14060W_A	orf19.7214
C6_01610W_A	C2_03100W_A	CR_09270C_A								C202410WA	CR09270CA	C114450CA	C1_14450C_A	orf19.7263
C4_00270W_A	C3_05130C_A	C1_04730C_A								C202540WA	C104730CA	CR09100CA	CR_09100C_A	orf19.7306
C2_02030W_A	C6_00100C_A	C2_02690W_A								C204370WA	C202690WA	CR09240CA	CR_09240C_A	orf19.7322
C6_04380W_A	CR_06700C_A	C1_13160W_A								C204380CA	C113160WA	CR09350CA	CR_09350C_A	orf19.7330
C1_04400C_A	C1_06900C_A	CR_00130C_A								C205290CA	CR00130CA	C305880CA	C3_05880C_A	orf19.7368
CR_04090C_A	C1_10100C_A	C1_10280C_A								C205410WA	C110280CA	C306280WA	C3_06280W_A	orf19.7404
C5_02000C_A	C4_02250C_A	C1_10780C_A								C205710CA	C110780CA	C306490WA	C3_06490W_A	orf19.7437
CR_08210C_A	CR_09240C_A	C1_10720C_A								C205720CA	C110720CA	CR00130CA	CR_00130C_A	orf19.7522
C1_04210C_A	C2_04580W_A	C4_05390W_A								C205760CA	C405390WA	C203260WA	C2_03260W_A	orf19.904
C3_04140C_A	CR_03500W_A	CR_09350C_A								C207010WA	CR09350CA	C106370CA	C1_06370C_A	PBR1
C1_12550C_A	CR_00620C_A	C1_07230W_A								C207190CA	C107230WA	CR10210WA	CR_10210W_A	PGA12
CR_07070C_A	CR_03090C_A	C3_00200C_A								C208160CA	C300200CA	C208640CA	C2_08640C_A	PST2
C2_04580W_A	CR_08340W_A	C3_01480C_A								C208930WA	C301480CA	C301480CA	C3_01480C_A	RKI1
C1_04290C_A	C1_13050W_A	C7_04040C_A								C209050CA	C704040CA	C102600WA	C1_02600W_A	SNO1
C1_08330C_A	C3_04140C_A	CR_07080W_A								C209910CA	CR07080WA	CR09290WA	CR_09290W_A	THI13
CR_10270C_A	C6_00850W_A	CR_03600C_A								C209970CA	CR03600CA
C2_00340C_A	C2_04310W_A	C2_05590C_A								C300640WA	C205590CA
C1_03220C_A	CR_00860C_A	CR_09670C_A								C301140WA	CR09670CA
C1_08500C_A	C6_01070C_A	C3_03010C_A								C301610WA	C303010CA
C7_02380C_A	C4_00200C_A	C1_12140W_A								C301720CA	C112140WA
C2_05250C_A	C6_01610W_A	C3_00640W_A								C302180CA	C300640WA
C5_00190C_A	C6_02330W_A	C1_08260C_A								C303410CA	C108260CA
C6_03700W_A	C1_00070W_A	C2_09600C_A								C303680WA	C209600CA
C4_02410C_A	C5_01230C_A	C7_00140C_A								C304590WA	C700140CA
C1_04610W_A	C1_11450C_A	C6_02010C_A								C304650WA	C602010CA
C2_07400C_A	CR_08460W_A	C3_03280C_A								C305150WA	C303280CA
C1_07900W_A	C7_02030W_A	C3_04180W_A								C305760WA	C304180WA
C1_02630C_A	C1_01060W_A	C2_08640C_A								C306970WA	C208640CA
C2_01620W_A	C1_14440C_A	CR_07710W_A								C307420WA	CR07710WA
CR_00510C_A	CR_10110W_A	C1_14290C_A								C307470WA	C114290CA
C1_13700W_A	C1_08060W_A	CR_08060C_A								C400020WA	CR08060CA
C1_06810W_A	CR_06150C_A	C3_06860C_A								C400330CA	C306860CA
C3_04830C_A	C1_13260W_A	C3_05190C_A								C400380WA	C305190CA
C4_01750C_A	C1_00490C_A	C2_00770W_A								C400410WA	C200770WA
CR_10250C_A	C3_06920W_A	C1_14450C_A								C400420CA	C114450CA
C6_00440C_A	C1_07410C_A	C3_07490W_A								C400860CA	C307490WA
C3_07640C_A	C1_11650W_A	C1_02430C_A								C401510WA	C102430CA
C1_11660W_A	C2_01440C_A	CR_10210W_A								C401950WA	CR10210WA
C1_10290W_A	C2_02370C_A	C2_03010C_A								C402470CA	C203010CA
C1_10550C_A	C4_01900C_A	C3_04810C_A								C402780WA	C304810CA
C3_06120C_A	C3_04950W_A	C1_04220C_A								C403290WA	C104220CA
C2_07900W_A	C4_06030W_A	C4_01950W_A								C403370CA	C401950WA
C4_06120W_A	C1_06370C_A	C3_06490W_A								C404390WA	C306490WA
C1_14440C_A	C5_05320C_A	C3_05880C_A								C404720WA	C305880CA
C3_02280C_A	C1_02860C_A	C2_03260W_A								C404800WA	C203260WA
CR_07150W_A	C6_03500C_A	C4_02270C_A								C404970CA	C402270CA
C3_02610C_A	C6_03960W_A	C2_07070W_A								C405580CA	C207070WA
C1_13860C_A	C1_11700C_A	CR_05170C_A								C405810WA	CR05170CA
C7_00930W_A	C2_05700W_A	CR_07790C_A								C406170CA	CR07790CA
C2_03270W_A	C5_04090C_A	C4_05140C_A								C407060WA	C405140CA
C5_02930C_A	C1_13760W_A	C3_03410C_A								C500080CA	C303410CA
C5_02860C_A	C5_05390C_A	C7_00940W_A								C500100CA	C700940WA
C1_05290W_A	C2_07630C_A	C1_10160W_A								C500150CA	C110160WA
C4_02710C_A	CR_07620W_A	C7_01650W_A								C500560WA	C701650WA
C2_06310C_A	CR_07400C_A	C3_06280W_A								C501540WA	C306280WA
C6_01860C_A	CR_02130W_A	C7_04210C_A								C501590WA	C704210CA
C3_04060C_A	CR_08210C_A	CR_09330C_A								C502380WA	CR09330CA
C6_00100C_A	CR_09290W_A	C5_03820C_A								C502660CA	C503820CA
C5_03610W_A	C3_05200W_A	CR_00520C_A								C504470CA	CR00520CA
C2_02370C_A	C5_04470C_A	C7_03860W_A								C505230CA	C703860WA
C1_02620C_A	C2_08800C_A	CR_04300W_A								C600850WA	CR04300WA
C2_02740C_A	CR_05390W_A	C4_02360W_A								C601420CA	C402360WA
CR_08250C_A	C3_05590C_A	C1_00140W_A								C601560WA	C100140WA
C2_04010C_A	C3_07340W_A									C601980CA
CR_06490C_A	CR_10490W_A									C602370CA
C1_13480W_A	C7_03570W_A									C602480WA
C7_02030W_A	C2_06310C_A									C602560WA
CR_04510W_A	CR_04530W_A									C602630CA
C1_13450W_A	C1_01520C_A									C603320WA
C1_04500W_A	CR_08150W_A									C603380WA
C1_09630W_A	C2_00340C_A									C603820CA
C2_03080W_A	C2_02030W_A									C603960WA
C4_02280W_A	C3_01730C_A									C604290WA
C2_05890C_A	C5_00930C_A									C604560WA
CR_02360W_A	C2_05550W_A									C700150WA
CR_03280W_A	CR_00510C_A									C700350CA
C6_04520W_A	C6_04280W_A									C701160CA
C6_00870C_A	C3_07150C_A									C701600WA
CR_10100C_A	C1_14120C_A									C701650WA
C2_08810C_A	C1_01300W_A									C701710WA
C2_01120W_A	C4_01770W_A									C702100WA
C1_08990C_A	C6_03230W_A									C703050WA
C3_07410C_A	C5_02710W_A									C703660CA
C7_01640W_A	CR_10840C_A									C704210CA
C7_00400W_A	C2_03090C_A									CR00090CA
C2_02760W_A	CR_04650W_A									CR00310CA
CR_07400C_A	C2_10860C_A									CR01130WA
C1_01690C_A	C1_03110W_A									CR01350CA
CR_06760C_A	C1_00710C_A									CR01490CA
C2_06730W_A	CR_09120C_A									CR02620CA
C4_05320W_A	C3_02110W_A									CR03020CA
CR_01400W_A	C5_04300C_A									CR03120WA
C2_04460W_A	CR_08090W_A									CR03520CA
C3_06590W_A	CR_10670W_A									CR03600CA
C1_01060W_A	C3_01420C_A									CR04080CA
C6_02040W_A	CR_04090C_A									CR04730WA
CR_00540C_A	C2_09060C_A									CR05480WA
C4_01900C_A	C1_00400W_A									CR07460CA
C4_00200C_A	C1_06100C_A									CR08560CA
CR_01620C_A	CR_10020C_A									CR08610WA
CR_07010W_A	C4_06620C_A									CR09010CA
CR_03090C_A	C4_04050C_A									CR09140CA
C1_09690W_A	CR_00090C_A									CR09330CA
C1_06900C_A	CR_09100C_A									CR10140WA
C3_01810C_A	CR_02860W_A									CR10200WA
C2_10030C_A	C3_01810C_A									C102220CA
C2_01780W_A	C1_01330C_A									CR06070WA
C1_06100C_A	C2_09970C_A									C207400CA
C1_00070W_A	C4_06120W_A									C108370WA
C2_00960C_A	C5_00480C_A									C108330CA
C1_10100C_A	C2_06960W_A									C103020CA
C1_13080W_A	C5_03610W_A									C102990CA
C4_05580C_A	CR_10270C_A									CR01750CA
C2_07630C_A	C4_01510W_A									C100070WA
C5_01230C_A	C3_07410C_A									C100110WA
C6_04420W_A	C1_11330C_A									C100180WA
C2_07140W_A	C3_06590W_A									C100440WA
C1_05950C_A	C6_02040W_A									C100590WA
C1_05890W_A	C3_06010W_A									C100680WA
C1_05720W_A	CR_10790W_A									C100710CA
C1_05630C_A	C1_03680W_A									C101030WA
C4_02340W_A	C5_00590W_A									C101110CA
C1_03370W_A	C2_00960C_A									C101370CA
C1_03510C_A	C1_10450W_A									C101480CA
C1_01530C_A	CR_03520C_A									C101520CA
C1_01640W_A	C1_00220W_A									C101690CA
C6_02330W_A	C3_07830W_A									C101870CA
C6_02100W_A	C1_01370C_A									C102150WA
C2_05410W_A	C1_00060W_A									C102260CA
C4_04800W_A	C2_06890C_A									C102420CA
C5_04300C_A	C1_13680C_A									C102460WA
C5_04470C_A	C3_07330W_A									C102520WA
C5_01540W_A	C1_07840W_A									C102590CA
C5_01560C_A	C1_12360C_A									C102620CA
C4_01840C_A	C7_00990W_A									C102710WA
C1_13260W_A	C4_02320C_A									C102820WA
C1_04360C_A	C3_04090W_A									C103030WA
C6_03960W_A	C5_01560C_A									C103110WA
CR_08050C_A	C1_09490C_A									C103130CA
C1_06890C_A	C4_04900W_A									C103190CA
CR_08350W_A	CR_05800C_A									C103210CA
CR_08480C_A	C3_07220C_A									C103350CA
C7_01710W_A	C1_04610W_A									C103380WA
CR_05800C_A	C5_03860W_A									C103500WA
C7_03660C_A	CR_09010C_A									C103520WA
C3_06920W_A	C4_02070W_A									C103780CA
C2_05550W_A	CR_04660C_A									C104000CA
C1_14090W_A	C1_10700C_A									C104020CA
CR_09010C_A	C1_03500W_A									C104210CA
CR_10020C_A	C1_04100C_A									C104240CA
C2_05700W_A	C1_14060W_A									C104500WA
C4_04150C_A	C3_05710W_A									C104520CA
C4_06570C_A	C5_04360C_A									C104610WA
C7_03250C_A	C2_10630W_A									C104680WA
C5_00590W_A	C3_04920C_A									C104730CA
C1_08030W_A	C1_02240W_A									C104770CA
C5_05390C_A	C5_02080C_A									C104830WA
C1_05960W_A	C6_01860C_A									C104890WA
CR_06340C_A	C1_02600W_A									C105240CA
C6_00750C_A	CR_09270C_A									C105290WA
CR_02820W_A	C1_04730C_A									C105300CA
C4_04530C_A	C2_00880W_A									C105530CA
C3_04880W_A	C2_02690W_A									C105560WA
C2_08870C_A	C1_01690C_A									C106020WA
C2_01380W_A	CR_07590W_A									C106450CA
C3_00720W_A	C1_09630W_A									C106550WA
C1_02480W_A	C1_13160W_A									C106580WA
C1_04100C_A	CR_00130C_A									C106960WA
C4_06980W_A	C4_02710C_A									C107230WA
C1_05300C_A	C4_00270W_A									C107410CA
C7_02810W_A	C1_10280C_A									C107430WA
C2_06870C_A	C1_10780C_A									C107520CA
CR_05390W_A	C1_10720C_A									C107600WA
C4_03940C_A	C4_05390W_A									C107710CA
C1_12510W_A	C3_04880W_A									C107870CA
C1_14120C_A	C7_02810W_A									C107890CA
C7_02570C_A	CR_09350C_A									C107900WA
C4_03520C_A	C1_07230W_A									C108010WA
C1_07030C_A	C3_04650W_A									C108090CA
C4_00130W_A	C3_00200C_A									C108100WA
C3_05710W_A	C7_00400W_A									C108320WA
C3_05000W_A	C3_01480C_A									C108400CA
C5_02300C_A	C7_04040C_A									C108410CA
C4_04050C_A	CR_07080W_A									C108560WA
CR_02860W_A	C1_06810W_A									C109030CA
C5_05300W_A	C4_00220C_A									C109190CA
C3_01990W_A	CR_03600C_A									C109460WA
C1_02460W_A	C2_05590C_A									C109630WA
C6_02240C_A	C6_03700W_A									C109690WA
C2_06810C_A	CR_09670C_A									C110040WA
C3_02110W_A	CR_00180C_A									C110160WA
C1_03020C_A	C4_04470W_A									C110390CA
C1_13050W_A	C3_03010C_A									C110430WA
CR_04100C_A	C1_12140W_A									C110550CA
C2_04600C_A	C7_00930W_A									C110700CA
C3_05100C_A	C3_00640W_A									C110790WA
C3_04500C_A	C1_08260C_A									C110870WA
C1_11060C_A	C2_09600C_A									C110940CA
C4_01520C_A	C7_03660C_A									C111060CA
C4_04890C_A	C7_00140C_A									C111170WA
C6_01970C_A	C6_02010C_A									C111330CA
C1_12390C_A	C2_10470C_A									C111360WA
CR_03030C_A	C3_03280C_A									C111450CA
C2_09430W_A	C2_06730W_A									C111480WA
C6_01700W_A	C3_04180W_A									C111660WA
C2_03960W_A	C2_08640C_A									C111700CA
C1_14110C_A	C1_06460C_A									C112030WA
C7_01790C_A	C3_04060C_A									C112050WA
C1_03110W_A	C1_00500C_A									C112210WA
C3_05240C_A	CR_07710W_A									C112380CA
C3_02470C_A	C1_14290C_A									C112390CA
C7_00990W_A	CR_08060C_A									C112490WA
CR_08360C_A	C3_06860C_A									C112590WA
C1_03090W_A	C3_05190C_A									C113050WA
C3_07150C_A	C2_00770W_A									C113080WA
C6_00650C_A	C1_14450C_A									C113160WA
C1_06450C_A	C4_02940W_A									C113300CA
C3_04670C_A	C3_07490W_A									C113580WA
C1_03030W_A	CR_00540C_A									C113670WA
C1_10870W_A	C1_02430C_A									C113700WA
C7_00960W_A	CR_10210W_A									C113760WA
C3_05200W_A	C2_03010C_A									C113780WA
CR_08150W_A	C3_04810C_A									C113830CA
C1_01480C_A	C1_04220C_A									C113860CA
C1_01370C_A	C3_02510C_A									C114100WA
C1_06460C_A	C4_01950W_A									C114110CA
C1_06580W_A	C3_06490W_A									C114130WA
C3_00090W_A	C3_05880C_A									C114220CA
C5_03540C_A	CR_01750C_A									C114440CA
C2_01610C_A	C3_07310C_A									C200210WA
CR_07630C_A	C2_03260W_A									C200340CA
C7_00710W_A	C4_02270C_A									C200380CA
CR_04810W_A	C2_07070W_A									C200480CA
C2_10620W_A	CR_05170C_A									C200610CA
C5_03070W_A	CR_07790C_A									C201000WA
C4_01270W_A	C4_05140C_A									C201020WA
C3_01490W_A	C3_03410C_A									C201090CA
C2_05610C_A	C7_00940W_A									C201120WA
C2_03820C_A	C1_10160W_A									C201380WA
C7_00020C_A	C3_06500W_A									C201590WA
C6_02730W_A	C1_04210C_A									C201600CA
C5_04270C_A	C7_01650W_A									C201610CA
C1_11450C_A	C3_06280W_A									C201620WA
C4_04470W_A	C7_04210C_A									C201670CA
CR_07800W_A	CR_09330C_A									C201780WA
C3_05230W_A	C5_03820C_A									C202030WA
C6_03500C_A	C7_01640W_A									C202320CA
C6_03030W_A	C1_05290W_A									C202370CA
C6_02710C_A	CR_00520C_A									C202690WA
C1_04870W_A	C7_03860W_A									C202740CA
C3_02510C_A	CR_04300W_A									C202760WA
C3_03870C_A	C4_02360W_A									C203010CA
C6_02220W_A	C1_00140W_A									C203060WA
C3_04090W_A										C203080WA
C5_04110W_A										C203160CA
C1_02520W_A										C203750WA
C4_06610C_A										C203810CA
CR_05180C_A										C203820CA
C5_00480C_A										C203960WA
C1_12970C_A										C204310WA
C1_08740C_A										C204460WA
CR_04380C_A										C204550CA
CR_01750C_A										C204580WA
C3_07810C_A										C204590CA
C1_03340C_A										C204600CA
C2_06210C_A										C204950CA
C1_12030W_A										C205030CA
C3_02780W_A										C205100CA
C2_09270C_A										C205250CA
C2_02830C_A										C205470WA
C6_03760C_A										C205500WA
CR_09950C_A										C205610CA
C1_13940W_A										C205660WA
C1_07410C_A										C205700WA
C3_07310C_A										C205890CA
C1_11330C_A										C206170CA
C1_02590C_A										C206210CA
C4_02320C_A										C206310CA
C2_00660C_A										C206640CA
C2_00680C_A										C206680WA
CR_06700C_A										C206730WA
C4_06390W_A										C206810CA
C2_06960W_A										C206820CA
C3_07950C_A										C206870CA
C1_04300C_A										C207160WA
CR_08090W_A										C207310WA
C2_07380W_A										C207320WA
C7_00860W_A										C207570WA
C4_04700W_A										C207900WA
C5_01820W_A										C208000CA
C2_01670C_A										C208010WA
C4_00220C_A										C208040CA
C1_06960W_A										C208140CA
C6_00820W_A										C208190WA
C6_01720C_A										C208500WA
C1_00400W_A										C208760CA
CR_03720W_A										C208780WA
C3_06870W_A										C209060CA
C2_08370C_A										C209230CA
C1_08380W_A										C209430WA
C3_01630W_A										C209520CA
C5_00930C_A										C209720WA
C5_02270W_A										C209750WA
C1_01350C_A										C210240WA
C6_01630W_A										C210350CA
C2_08760C_A										C210480WA
C2_09900C_A										C210550CA
C1_11220C_A										C210620WA
C1_08320W_A										C210690WA
CR_00860C_A										C300090WA
C1_02640C_A										C300220WA
C7_02680W_A										C300240CA
C7_02640W_A										C300250CA
C3_01550C_A										C300290WA
C3_07440W_A										C300320WA
CR_08460W_A										C300720WA
C5_02710W_A										C300760WA
CR_10350C_A										C300810CA
C3_06180C_A										C300880WA
C1_00490C_A										C301030WA
CR_09120C_A										C301390CA
C1_00710C_A										C301410CA
C1_00060W_A										C301450CA
C3_06500W_A										C301470WA
C4_07180W_A										C301490WA
C3_07270C_A										C301550CA
CR_04660C_A										C301600WA
CR_07050C_A										C301700WA
C3_01730C_A										C301960CA
C2_06640C_A										C301990WA
CR_05780W_A										C302110WA
CR_01970C_A										C302170CA
C2_08190W_A										C302320WA
C5_01210W_A										C302470CA
C1_11170W_A										C302810CA
C2_05180W_A										C302940CA
C1_02990C_A										C302950CA
CR_10840C_A										C303040WA
C1_04890W_A										C303420CA
CR_04200W_A										C303480CA
C1_02860C_A										C303520CA
C5_02890W_A										C303710WA
C7_02300W_A										C303720WA
C1_03500W_A										C303730CA
CR_07520C_A										C303800WA
CR_00580W_A										C304180WA
C3_05370C_A										C304270CA
C2_08590W_A										C304430WA
C2_02590W_A										C304500CA
C4_02870C_A										C304670CA
C1_08980C_A										C304830CA
CR_07620W_A										C304950WA
C2_08800C_A										C304960WA
C3_01470W_A										C305100CA
C1_10830W_A										C305200WA
C1_12550C_A										C305240CA
C4_05780C_A										C305520CA
C5_04070C_A										C305530WA
CM_00030W C										C305560WA
C7_03360W_A										C306010WA
C6_04600W_A										C306360CA
C2_00520W_A										C306500WA
C3_03030C_A										C306590WA
C5_02460C_A										C306870WA
CR_02130W_A										C306910CA
C3_07830W_A										C307060WA
C1_02130C_A										C307150CA
C1_02150W_A										C307220CA
C1_00500C_A										C307410CA
C5_05320C_A										C307640CA
C6_04580W_A										C307830WA
C3_02960C_A										C400140CA
C1_04000C_A										C400160CA
C2_09750W_A										C400200CA
CR_10790W_A										C400220CA
C3_01830C_A										C400240CA
C6_04590C_A										C401010CA
C1_08060W_A										C401200CA
C6_00980C_A										C401270WA
C4_05810W_A										C401370WA
C2_08330W_A										C401520CA
C2_01440C_A										C401690CA
C2_02170W_A										C401770WA
C2_00880W_A										C401900CA
C2_07750W_A										C402020WA
C4_03130W_A										C402070WA
C4_02450W_A										C402120WA
C1_03120W_A										C402270CA
C5_01980C_A										C402280WA
C5_03930C_A										C402360WA
CR_01280C_A										C402410CA
CR_00690C_A										C402550CA
C6_01460C_A										C402870CA
C5_04260W_A										C402940WA
C5_04940W_A										C402980WA
C2_10470C_A										C402990CA
C2_10630W_A										C403360CA
CR_04490C_A										C403790WA
C3_04650W_A										C403940CA
C1_07040C_A										C404150CA
C7_02260W_A										C404480CA
CR_10200W_A										C404590WA
C1_12490W_A										C404700WA
C2_08430C_A										C404890CA
C2_00480C_A										C404900WA
C1_10430W_A										C405240CA
C6_02000W_A										C405320WA
C2_06880C_A										C405460CA
C5_01450W_A										C405540WA
C1_05770C_A										C405550CA
CR_04550W_A										C406110CA
C7_03390C_A										C406120WA
C4_02000C_A										C406270CA
C1_00770C_A										C406610CA
C5_00220W_A										C406720WA
C1_13050W_A										C406830CA
C1_00180W_A										C406870WA
C6_02730W_A										C407090CA
C6_03490C_A										C407110CA
C2_03670W_A										C407180WA
C5_00480C_A										C500110CA
C1_01520C_A										C500190CA
C1_09140C_A										C500370WA
C5_04090C_A										C500500WA
C3_05130C_A										C500590WA
CR_05720W_A										C500640CA
C1_09800C_A										C500830CA
C2_08290C_A										C501210WA
CR_01650W_A										C501250WA
										C501290CA
										C501690CA
										C501820WA
										C502030WA
										C502170CA
										C502270WA
										C502300CA
										C502490CA
										C502530WA
										C502710WA
										C502890WA
										C503070WA
										C503280WA
										C503390CA
										C503540CA
										C503610WA
										C503820CA
										C504110WA
										C504440CA
										C504570CA
										C504590CA
										C504700CA
										C504810WA
										C504880CA
										C505050WA
										C505120WA
										C505380WA
										C505400WA
										C505490CA
										C600100CA
										C600130CA
										C600150WA
										C600330CA
										C600410CA
										C600600CA
										C600650CA
										C600840WA
										C600870CA
										C601670WA
										C601700WA
										C601860CA
										C601930WA
										C601970CA
										C602010CA
										C602070CA
										C602120WA
										C602260CA
										C602500CA
										C602730WA
										C602770WA
										C603340CA
										C603400CA
										C603410CA
										C603770CA
										C603920WA
										C604270WA
										C604310WA
										C604520WA
										C700110WA
										C700320CA
										C700400WA
										C700550CA
										C700620WA
										C700710WA
										C700820WA
										C700930WA
										C700960WA
										C700990WA
										C701640WA
										C701790CA
										C701800CA
										C701850CA
										C701900WA
										C701970CA
										C702240WA
										C702300WA
										C702330WA
										C702640WA
										C702810WA
										C702840CA
										C703250CA
										C703360WA
										C703390CA
										C703670WA
										C703720CA
										C703810WA
										C703930CA
										C704020CA
										C704130CA
										CR00200WA
										CR00360CA
										CR00510CA
										CR00520CA
										CR00580WA
										CR00640WA
										CR00780CA
										CR01040CA
										CR01310WA
										CR01400WA
										CR01470WA
										CR01590CA
										CR01690CA
										CR01740WA
										CR01760CA
										CR01970CA
										CR01980CA
										CR02070CA
										CR02130WA
										CR02140WA
										CR02170WA
										CR02180WA
										CR02360WA
										CR02400WA
										CR02820WA
										CR03030CA
										CR03060WA
										CR03170WA
										CR03280WA
										CR03500WA
										CR03610CA
										CR03720WA
										CR03770CA
										CR04000WA
										CR04090CA
										CR04100CA
										CR04190WA
										CR04200WA
										CR04240CA
										CR04380CA
										CR04530WA
										CR04550WA
										CR04590CA
										CR04740CA
										CR04810WA
										CR05050WA
										CR05080WA
										CR05170CA
										CR05180CA
										CR05340CA
										CR05380CA
										CR05390WA
										CR05790CA
										CR06080WA
										CR06150CA
										CR06750CA
										CR06760CA
										CR06860CA
										CR07010WA
										CR07050CA
										CR07150WA
										CR07290WA
										CR07400CA
										CR07420WA
										CR07520CA
										CR07560WA
										CR07590WA
										CR07620WA
										CR07630CA
										CR07650WA
										CR07710WA
										CR08060CA
										CR08090WA
										CR08150WA
										CR08160WA
										CR08250CA
										CR08910CA
										CR08950WA
										CR09120CA
										CR09160CA
										CR09320CA
										CR09380WA
										CR09550CA
										CR09690CA
										CR09950CA
										CR09970WA
										CR10160WA
										CR10250CA
										CR10300WA
										CR10360CA
										CR10840CA
										CM00030W C
										CM00210W C
										CM00320W N
										C701250WA
										C701810WA
										C702030WA
										C702380CA
										C702890CA
										C703450CA
										C704300WA
										CR01620CA
										C503350WA
										C402900CA
										C103790CA
										CR02860WA
										C406570CA
										C406500WA
										C406400CA
										C104100CA
										C102480WA
										C102760WA
										C102790WA
										C104170CA
										C104180WA
										C103090WA
										C103220CA
										C103230CA
										C103340CA
										C103370WA
										C103680WA
										C406980WA
										C104290CA
										C406800WA
										C104300CA
										C502000CA
										CR00990WA
										CR00860CA
										C101250WA
										C101350CA
										C403470CA
										C601910WA
										C601720CA
										C601610WA
										C602220WA
										C602240CA
										C604380WA
										C602270CA
										C602040WA
										C205460WA
										C208810CA
										C600820WA
										C600790CA
										C600760WA
										C600750CA
										#N/A
										CR07790CA
										CR07800WA
										C404530CA
										C404470WA
										CR06340CA
										C504130CA
										C504270CA
										#N/A
										C504730CA
										C505390CA
										C209320CA
										C501580CA
										na
										C502460CA
										#N/A
										C600370CA
										C402250CA
										C401750CA
										C401490WA
										C401440WA
										C400890WA
										C108740CA
										C109490CA
										C109640WA
										C109680WA
										C109720WA
										C107700CA
										#N/A
										C113060CA
										C113450WA
										C113480WA
										C113870WA
										C113940WA
										C113960WA
										C405690WA
										C108210CA
										C112360CA
										C404050CA
										C300600WA
										C603030WA
										C400130WA
										C603700WA
										C603720WA
										C603760CA
										C203100WA
										C403520CA
										C304380CA
										C304910CA
										C305220WA
										C305230WA
										C100220WA
										C100060WA
										C208290CA
										C107070CA
										C107030CA
										C106940CA
										C106930WA
										C106810WA
										C112770WA
										C209780CA
										CR08210CA
										CR08700CA
										C209640WA
										C701560CA
										C701450CA
										CR05780WA
										CR05720WA
										C703600WA
										C307440WA
										C306890WA
										C303870CA
										C201430WA
										C201480WA
										C201640WA
										C302280CA
										C302150CA
										C301860CA
										C301830CA
										C301810CA
										C301730CA
										CR02530WA
										CR04660CA
										C210210CA
										C210030CA
										C210010CA
										C206390CA
										C405450CA
										CR07080WA
										CR07070CA
										C110620WA
										C207380WA
										C200100CA
										C201300CA
										C200520WA
										C208870CA
										C207260CA
										C207290WA
										C110720CA
										C302480CA
										C302500WA
										C302510CA
										C106100CA
										C105960WA
										C302610CA
										C303170WA
										C501770CA
										C303280CA
										CR05440WA
										C108380WA
										C108450CA
										C108500CA
										C108590CA
										C112850WA
										C104970WA
										CR04510WA
										CR04570CA
										C602610CA
										C307810CA
										C307950CA
										C111220CA
										C601990WA
										C305370CA
										C700860WA
										CR06490CA
										C114120CA
										C114260CA
										CR09270CA
										C306100CA
										C306120CA
										C306250WA
										C306180CA
										C405150WA
										CR00540CA
										CR00180CA
										CR00120CA
										CR10020CA
										CR10110WA
										CR10490WA
										CR10670WA
										C302780WA
										C204010CA
										C203390CA
										C203330CA
										C203270WA
										C500480CA
										C500660CA
										C500650CA
										C301630WA
										C103620CA
										C604130CA
