# Supplementary material for: Mass Spectrometry-based Proteomic and Immunoproteomic Analyses of the Candida albicans Hyphal Secretome Reveal Diagnostic Biomarker Candidates for Invasive Candidiasis
Source: Preprints.org preprint supplement (doi:10.20944/preprints202105.0752.v1), 2021-05-31
Supplement: Supplementary file 1 [file supplementary › Table S6.xlsx]

## Sheet: Supplementary Table 6
Table S6. C. albicans hyphal secreted proteins identified in our study that were previously described in surfome studies.
Standard Name	Function	References
Cip1	Possible oxireductase;	[38, 65]
Cmd1	Calmodulin;	[38, 65]
Egd1	Putative GAL4 DNA-binding enhancer protein	[38, 65,66]
Hnt1	Protein with similarity to protein kinase C inhibitor-I	[38, 65]
Hsp12	Heat-shock protein; induced by osmotic/oxidative/cadmium stress	[38, 65]
Mdg1	Uncharacterized	[38, 65]
orf.19.5943.1	Uncharacterized	[38, 65]
orf.19.7196	Uncharacterized	[38, 68]
orf. 19.7368	Uncharacterized	[38, 65]
Sbp1	Uncharacterized	[38, 65]
Slk19	Alkaline-induced protein of plasma membrane; affects cell aggregation, cell wall	[38, 65, 66]
Spe3	Uncharacterized	[38, 67]
Tpm2	Uncharacterized	[38, 65, 67]
